# Supplementary material for: The first macrocyclic abnormally coordinating tetra-1,2,3-triazole-5-ylidene iron complex: a promising candidate for olefin epoxidation
Source: Royal Society of Chemistry journal article supplement (doi:10.1039/d2dt02561b), 2022-01-01
Supplement: d2dt02561b1.pdf [file d2dt02561b1.pdf]

## Supporting Information (SI)

### **The first macrocyclic abnormally coordinating tetra-1,2,3-triazole-5-ylidene iron complex: a promising candidate for olefin epoxidation**

Greta G. Zámbo, Johannes Mayr, Michael J. Sauer, Tim P. Schlachta, Robert M. Reich and Fritz E. Kühn\*

Molecular Catalysis, Department of Chemistry and Catalysis Research Centre, Technische Universität München, Lichtenbergstr. 4, 85784 Garching bei München, Germany, E-mail: fritz.kuehn@ch.tum.de

[\*] Coresponding author: Prof. Dr. Fritz E. Kühn, E-Mail: fritz.kuehn@ch.tum.de

#### **Table of Contents**

|                                                                                                |    |
|------------------------------------------------------------------------------------------------|----|
| 1. General considerations .....                                                                | 2  |
| 2. Single crystal X-ray diffraction.....                                                       | 3  |
| 3. Cyclic voltammetry .....                                                                    | 9  |
| 4. Experimental data .....                                                                     | 10 |
| 4.1 Synthesis of calix[4]1,2,3-triazole a .....                                                | 10 |
| 4.2 Synthesis of calix[4]3-methyl-1,2,3-triazolium salts b and c.....                          | 17 |
| 4.3 Synthesis of iron(II) calix[4]3-methyl-1,2,3-triazol-5-ylidene hexafluorophosphate 2 ..... | 19 |
| 5. NMR-Spectra .....                                                                           | 20 |
| 6. Catalytic procedure .....                                                                   | 35 |
| 7. References.....                                                                             | 38 |

## 1. General considerations

**Experimental remarks.** Unless otherwise stated, all manipulations were carried out under an argon atmosphere using standard *Schlenk* and glovebox techniques. Dry and degassed solvents were obtained from an Mbraun solvent purification system, degassed *via* freeze-pump-thaw (3 cycles) and stored over molecular sieve (3 or 4 Å) prior to use. Thin-layer chromatography (TLC) was performed on precoated Merck 60 GF254 silica gel plates with a fluorescent indicator. Detection of the individual spots was carried out with UV light at 254 nm and/or by staining with a potassium permanganate solution. Column chromatography is carried out with normal-phase silica gel as stationary phase.  $\text{Fe}(\text{btsa})_2(\text{THF})^1$  and thianthrenyl hexafluorophosphate<sup>2</sup> were synthesised according to literature procedures. Tetrabutylammonium hexafluorophosphate ( $[\text{N}(n\text{-Bu})_4]\text{PF}_6$ ) was recrystallized three times from ethanol<sup>3</sup>, and ferrocene was sublimed prior to use. All other reagents were purchased from commercial suppliers and used without further purification. NMR spectra were recorded on a Bruker Advanced Ultrashield AV400 (400 MHz) or AV500 (500 MHz) spectrometer at a temperature of 297 K. Chemical shifts ( $\delta$ ) are reported in ppm and referenced to the residual signal of the deuterated solvent<sup>4</sup>. The following abbreviations are used for the signal multiplicities: singlet (s), doublet (d), triplet (t), heptet (hept), multiplet (m), broad singlet (bs). <sup>13</sup>C-, <sup>19</sup>F-, and <sup>31</sup>P-NMR spectra were recorded with <sup>1</sup>H-decoupling. Elemental analyses (C/H/N/S) were performed by the microanalytical laboratory at Technische Universität München. Electrospray ionization mass spectrometry (ESI-MS) data were acquired on a Thermo Fisher Ultimate 3000. Cyclic Voltammetry was performed with a BioLogic SP200 potentiostat with EC-Lab software, using 3 mm diameter glassy carbon disk electrodes (PalmSens, Houten Netherlands) as working and counter electrodes. Prior to use, electrodes were polished with 0.05 µm alumina suspensions (CH Instruments Inc., USA).  $\text{Ag}/\text{AgNO}_3$  (10 mM  $\text{AgNO}_3$  and 100 mM  $[\text{N}(n\text{-Bu})_4]\text{PF}_6$  in MeCN) was used as the reference electrode, separated *via* a Vycor 3535 frit (Advanced Glass & Ceramics, Holden, MA). CV measurements were conducted in a five-necked glass cell under an argon atmosphere. A scan rate of 100 mV/s was applied. Potentials are reported with reference to an internal standard of ferrocenium/ferrocene ( $\text{Fc}/\text{Fc}^+$ ). Tetrabutylammonium hexafluorophosphate  $[\text{N}(n\text{-Bu})_4]\text{PF}_6$  (100 mM in dry and degassed MeCN) was used as the electrolyte. The concentration of the complex was about 0.3 mM. UV-Vis spectra were recorded on an Agilent Technologies Cary 60 UV-Vis spectrophotometer at 20 °C. The concentration of the complex was 0.2 mM dissolved in dry and degassed MeCN. GC analysis was performed with an Agilent Technologies 7890B GC-FID system with a 7693A Automatic Liquid Sampler for 150 samples with G4513A Autoinjector using a HP-5 column (30 m × 320 µm × 0.25µm).

## 2. Single crystal X-ray diffraction

X-ray crystallographic data was collected on a Bruker D8 Venture single crystal X-ray diffractometer with the following setup: A CMOS detector (Bruker Photon-100), a Mo IMS microsource and a Helios optic using the APEX3 software package.<sup>5</sup> The measurement used MoK $\alpha$  radiation ( $\lambda = 0.71073 \text{ \AA}$ ) and was performed on a single crystal coated with perfluorinated ether. The crystal was fixed on top of a micromount sample holder and frozen under a stream of cold nitrogen at 100 K. A matrix scan was used to determine the initial lattice parameters. Reflections were corrected for Lorentz and polarisation effects, scan speed, and background using SAINT.<sup>6</sup> Absorption corrections, including odd and even ordered spherical harmonics were performed using SADABS.<sup>7</sup> Space group assignment was based upon systematic absences, E statistics, and successful refinement of the structure. The structure was solved by direct methods (SHELXT) with the aid of successive difference Fourier maps, and was refined against all data using SHELXL-2015 in conjunction with SHELXLE.<sup>8-10</sup> Hydrogen atoms were calculated in ideal positions as follows: Methyl hydrogen atoms were refined as part of rigid rotating groups, with a C–H distance of 0.98  $\text{\AA}$  and  $U_{iso}(\text{H}) = 1.5 \cdot U_{eq}(\text{C})$ . Other H atoms were placed in calculated positions and refined using a riding model, with methylene and aromatic C–H distances of 0.99  $\text{\AA}$  and 0.95  $\text{\AA}$ , respectively, other C–H distances of 1.00  $\text{\AA}$  and  $U_{iso}(\text{H}) = 1.2 \cdot U_{eq}(\text{C})$ . Non-hydrogen atoms were refined with anisotropic displacement parameters. Full-matrix least-squares refinements were carried out by minimizing  $\sum w(F_o - F_c)^2$  with SHELXL weighting scheme. Neutral atom scattering factors for all atoms and anomalous dispersion corrections for the non-hydrogen atoms were taken from *International Tables for Crystallography*.<sup>11</sup> The image of the crystal structure was generated with Mercury<sup>12</sup> or Platon<sup>13</sup>. CCDC 2184662 and 2184663 contain the supplementary crystallographic data for this paper. This data can be obtained free of charge *via* [www.ccdc.cam.ac.uk/data\\_request/cif](http://www.ccdc.cam.ac.uk/data_request/cif), or by emailing [data\\_request@ccdc.cam.ac.uk](mailto:data_request@ccdc.cam.ac.uk), or by contacting The Cambridge Crystallographic Data Centre, 12 Union Road, Cambridge CB2 1EZ, UK; fax: +44 1223 336033.

Single crystals of calix[4]3-methyl-1,2,3-triazolium methyltriflate salt **b** suitable for X-ray diffraction were obtained in acetonitrile at 0 °C. A clear colourless plate-like specimen of C<sub>24</sub>H<sub>30</sub>F<sub>12</sub>N<sub>14</sub>O<sub>12</sub>S<sub>4</sub>, approximate dimensions 0.089 mm x 0.274 mm x 0.385 mm, was used for the X-ray crystallographic analysis.

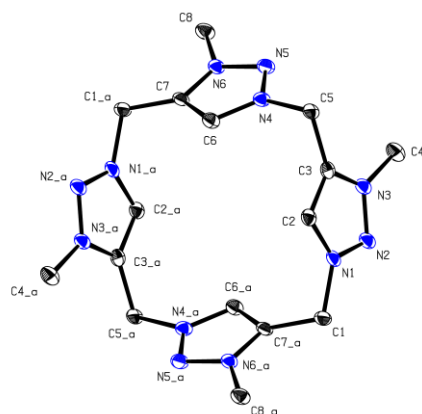

**Fig. S1** ORTEP-style representation of the cationic fragment of calix[4]3-methyl-1,2,3-triazolium methyltriflate salt **b**. Hydrogen atoms and OTf<sup>-</sup> anions, as well as a co-crystallised MeCN molecule are omitted for clarity and thermal ellipsoids are shown at 50% probability level. Symmetry code:  $-x+1, -y+1, -z+1$ .

**Table S1.** Crystallographic data and structure refinement parameters of compound **b**.

| <b>Sample and Crystal Data</b>                  |                                                                                                                                                                           |
|-------------------------------------------------|---------------------------------------------------------------------------------------------------------------------------------------------------------------------------|
| CCDC number                                     | 2184662                                                                                                                                                                   |
| Chemical formula                                | C <sub>24</sub> H <sub>30</sub> F <sub>12</sub> N <sub>14</sub> O <sub>12</sub> S <sub>4</sub>                                                                            |
| Formula weight                                  | 1062.86 g/mol                                                                                                                                                             |
| Temperature                                     | 100(2) K                                                                                                                                                                  |
| Wavelength                                      | 0.71073 Å                                                                                                                                                                 |
| Crystal size                                    | 0.089 x 0.274 x 0.385 mm                                                                                                                                                  |
| Crystal habit                                   | clear colourless plate                                                                                                                                                    |
| Crystal System                                  | monoclinic                                                                                                                                                                |
| Space group                                     | P 1 21/c 1                                                                                                                                                                |
| Unit cell dimensions                            | a = 10.1484(9) Å      α = 90 °<br>b = 19.9082(16) Å    β = 97.161(3) °<br>c = 10.3888(8) Å     γ = 90 °                                                                   |
| Volume                                          | 2082.5(3) Å <sup>3</sup>                                                                                                                                                  |
| Z                                               | 2                                                                                                                                                                         |
| Density (calculated)                            | 1.695 g/cm <sup>3</sup>                                                                                                                                                   |
| Absorption coefficient                          | 0.356 mm <sup>-1</sup>                                                                                                                                                    |
| F(000)                                          | 1080                                                                                                                                                                      |
| <b>Data Collection and Structure Refinement</b> |                                                                                                                                                                           |
| Diffractometer                                  | Bruker D8 Venture                                                                                                                                                         |
| Radiation Source                                | IMS microsource, Mo                                                                                                                                                       |
| Theta range for data collection                 | 2.02 to 25.68 °                                                                                                                                                           |
| Index ranges                                    | -12 ≤ h ≤ 12, -24 ≤ k ≤ 24, -12 ≤ l ≤ 12                                                                                                                                  |
| Reflections collected                           | 59531                                                                                                                                                                     |
| Independent reflections                         | 3954 [R(int) = 0.0618]                                                                                                                                                    |
| Coverage of independent reflections             | 99.7%                                                                                                                                                                     |
| Absorption correction                           | Multi-Scan                                                                                                                                                                |
| Max. and min. transmission                      | 0.9690 and 0.8750                                                                                                                                                         |
| Structure solution technique                    | direct methods                                                                                                                                                            |
| Structure solution program                      | SHELXT 2018/2 (Sheldrick, 2018)                                                                                                                                           |
| Function minimized                              | Σ w(F <sub>o</sub> <sup>2</sup> - F <sub>c</sub> <sup>2</sup> ) <sup>2</sup>                                                                                              |
| Refinement method                               | Full-matrix least-squares on F <sup>2</sup>                                                                                                                               |
| Refinement program                              | SHELXL-2018/3 (Sheldrick, 2018)                                                                                                                                           |
| Data / restraints / parameters                  | 3954 / 0 / 301                                                                                                                                                            |
| Goodness-of-fit on F <sup>2</sup>               | 1.138                                                                                                                                                                     |
| Final R indices                                 | 3280 data; I > 2σ(I)      R1 = 0.0430, wR2 = 0.0793<br>all data                      R1 = 0.0559, wR2 = 0.0837                                                            |
| Weighting scheme                                | w = 1 / [σ <sup>2</sup> (F <sub>o</sub> <sup>2</sup> ) + (0.0139P) <sup>2</sup> + 3.4897P]<br>where P = (F <sub>o</sub> <sup>2</sup> + 2F <sub>c</sub> <sup>2</sup> ) / 3 |
| Largest diff. max. min.                         | 0.502 and -0.490 eÅ <sup>-3</sup>                                                                                                                                         |
| R.M.S. deviation from mean                      | 0.062 eÅ <sup>-3</sup>                                                                                                                                                    |

A red block-like specimen of complex **2**, approximate dimensions 0.068 mm x 0.076 mm x 0.116 mm, was used for the X-ray crystallographic analysis.

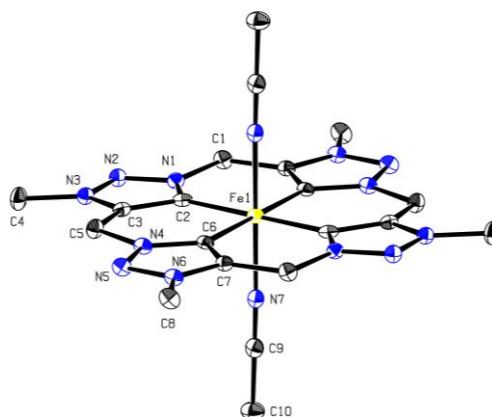

**Fig. S2** ORTEP-style representation of the cationic fragment of iron(II) calix[4]3-methyl-1,2,3-triazol-5-ylidene hexafluorophosphate **2**. Hydrogen atoms and  $\text{PF}_6^-$  anions, as well as a co-crystallised MeCN molecule are omitted for clarity and thermal ellipsoids are shown at 50% probability level. Symmetry code:  $-x+1, -y+2, -z+1$ .

**Table S2.** Crystallographic data and structure refinement parameters of complex **2**.

| Sample and Crystal Data                  |                                                                                                                            |
|------------------------------------------|----------------------------------------------------------------------------------------------------------------------------|
| Chemical formula                         | 2184663                                                                                                                    |
| Chemical formula                         | C <sub>24</sub> H <sub>32</sub> F <sub>12</sub> FeN <sub>16</sub> P <sub>2</sub>                                           |
| Formula weight                           | 890.44 g/mol                                                                                                               |
| Temperature                              | 100(2) K                                                                                                                   |
| Wavelength                               | 0.71073 Å                                                                                                                  |
| Crystal size                             | 0.068 x 0.076 x 0.116 mm                                                                                                   |
| Crystal habit                            | red block                                                                                                                  |
| Crystal System                           | triclinic                                                                                                                  |
| Space group                              | P -1                                                                                                                       |
| Unit cell dimensions                     | a = 9.1316(7) Å      α = 112.440(3) °<br>b = 9.4899(9) Å      β = 109.710(3) °<br>c = 11.6931(10) Å    γ = 94.233(4) °     |
| Volume                                   | 857.48(13) Å <sup>3</sup>                                                                                                  |
| Z                                        | 1                                                                                                                          |
| Density (calculated)                     | 1.724g/cm <sup>3</sup>                                                                                                     |
| Absorption coefficient                   | 0.646 mm <sup>-1</sup>                                                                                                     |
| F(000)                                   | 452                                                                                                                        |
| Data Collection and Structure Refinement |                                                                                                                            |
| Diffractometer                           | Bruker D8 Venture                                                                                                          |
| Radiation Source                         | IMS microsource, Mo                                                                                                        |
| Theta range for data collection          | 2.02 to 25.68 °                                                                                                            |
| Index ranges                             | -11<=h<=11, -11<=k<=11, -14<=l<=14                                                                                         |
| Reflections collected                    | 31239                                                                                                                      |
| Independent reflections                  | 3267 [R(int) = 0.0677]                                                                                                     |
| Coverage of independent reflections      | 100.0%                                                                                                                     |
| Absorption correction                    | Multi-Scan                                                                                                                 |
| Max. and min. transmission               | 0.9570 and 0.9290                                                                                                          |
| Structure solution technique             | direct methods                                                                                                             |
| Structure solution program               | SHELXT 2018/2 (Sheldrick, 2018)                                                                                            |
| Function minimized                       | Σ w(Fo <sup>2</sup> - Fc <sup>2</sup> ) <sup>2</sup>                                                                       |
| Refinement method                        | Full-matrix least-squares on F <sup>2</sup>                                                                                |
| Refinement program                       | SHELXL-2018/3 (Sheldrick, 2018)                                                                                            |
| Data / restraints / parameters           | 3267 / 0 / 254                                                                                                             |
| Goodness-of-fit on F2                    | 1.039                                                                                                                      |
| Final R indices                          | 2850 data; I>2σ(I)      R1 = 0.0316, wR2 = 0.0652<br>all data                      R1 = 0.0389, wR2 = 0.0686               |
| Weighting scheme                         | w=1/[σ <sup>2</sup> (Fo <sup>2</sup> )+( 0.0186P) <sup>2</sup> +0.9044P]<br>where P=(Fo <sup>2</sup> +2Fc <sup>2</sup> )/3 |
| Largest diff. max. min.                  | 0.303 and -0.316 eÅ <sup>-3</sup>                                                                                          |
| R.M.S. deviation from mean               | 0.057 eÅ <sup>-3</sup>                                                                                                     |

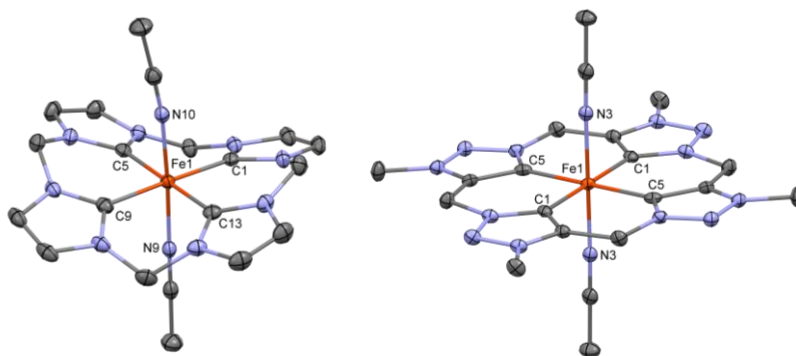

**Fig. S3** ORTEP-style representation of the cationic fragment of compound **1**<sup>14</sup> (left) and **2** (right). Hydrogen atoms and PF<sub>6</sub><sup>-</sup> anions, as well as co-crystallised MeCN molecules are omitted for clarity and thermal ellipsoids are shown at 50% probability level.

**Table S3.** Comparison of selected crystallographic data of compound **1** and **2**.

| <b>Bond length [Å]</b>               | <b>1</b> | <b>2</b>   | <b>Δ [Å]</b> | <b>σ<sub>Δ</sub> [Å]</b> |
|--------------------------------------|----------|------------|--------------|--------------------------|
| Fe–C <sub>NHC</sub>                  | 1.907(3) | 1.928(2)   | 0.021        | 0.0036                   |
| Fe–N                                 | 1.932(3) | 1.9247(17) | 0.0073       | 0.0034                   |
| <b>Bond Angles [°]</b>               | <b>1</b> | <b>2</b>   | <b>Δ [°]</b> | <b>σ<sub>Δ</sub> [°]</b> |
| N–Fe–N                               | 177.1(1) | 180.0(0)   | 2.9          | 1                        |
| C <sub>1</sub> –Fe–C <sub>9/1</sub>  | 178.3(1) | 180.0(0)   | 1.7          | 1                        |
| C <sub>5</sub> –Fe–C <sub>13/5</sub> | 179.6(1) | 180.0(0)   | 0.4          | 1                        |



### 3. Cyclic voltammetry

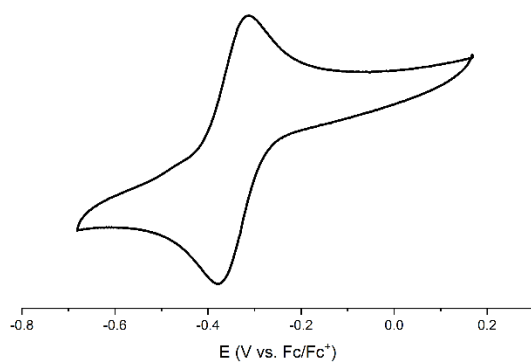

**Fig. S4** Cyclic voltammogram of **2** in acetonitrile. Half-cell potential is determined to be  $E_{1/2} = -0.34$  V (Fe<sup>II</sup>/Fe<sup>III</sup>) and oxidation/reduction potentials are determined to be  $E_{ox} = -0.31$  V and  $E_{red} = -0.38$  V.



of an aqueous, saturated solution of ammonium chloride are added, whereas a colourless solid participates. The aqueous mixture is extracted with dichloromethane (3 x 300 mL). The organic phases are collected, dried with MgSO<sub>4</sub>, filtrated and concentrated under reduced pressure (150 mbar, 60 °C). The crude product is purified *via* column chromatography (SiO<sub>2</sub>, *n*-hexane:DCM = 19:1, R<sub>f</sub> = 0.75). 15.9 g of the product are obtained as colourless oil (57.9 mmol, 62%).

<sup>1</sup>H-NMR (400 MHz, CDCl<sub>3</sub>): δ [ppm] = 3.94 (s, 2 H, CH<sub>2</sub>), 1.09 – 1.06 (m, 21 H, CH(CH<sub>3</sub>)<sub>3</sub>).

<sup>13</sup>C-NMR (400 MHz, CDCl<sub>3</sub>): δ [ppm] = 102.00 (SiCCCH<sub>2</sub>), 89.24 (SiCCCH<sub>2</sub>), 18.65 (CH<sub>3</sub>), 15.03 (CH<sub>2</sub>), 11.31 (CH).

### (3-Azidoprop-1-yn-1-yl)triisopropylsilane **S3**

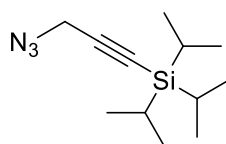

**S3**

C<sub>12</sub>H<sub>23</sub>N<sub>3</sub>Si  
237.42 g/mol

(3-Azidoprop-1-yn-1-yl)triisopropylsilane **S3** was synthesised according to a literature known procedure.<sup>16</sup> 15.9 g (3-Bromoprop-1-yn-1-yl)triisopropylsilane **S2** (57.9 mmol, 1.00 eq.) and 7.53 g sodium azide (116 mmol, 2.00 eq.) are suspended in 400 mL methanol. The mixture is stirred for 16 h at 75 °C under reflux. The solution is concentrated under reduced pressure (350 mbar, 60 °C), whereas a colourless solid participates. Subsequently, 250 mL water and 200 mL ethyl acetate are added. The water phase is separated and extracted with ethyl acetate (2 x 100 mL). The collected organic layers are washed with 30 mL water and 30 mL brine, dried *via* MgSO<sub>4</sub>, filtered and the volatiles are removed under reduced pressure. 12.4 g of the product are obtained as slight yellow oil (52.0 mmol, 90%) and utilised without further purification.

<sup>1</sup>H-NMR (400 MHz, CDCl<sub>3</sub>): δ [ppm] = 3.95 (s, 2 H, CH<sub>2</sub>), 1.10 – 1.07 (m, 21 H, CH(CH<sub>3</sub>)<sub>3</sub>).

<sup>13</sup>C-NMR (400 MHz, CDCl<sub>3</sub>): δ [ppm] = 98.65 (SiCCCH<sub>2</sub>), 89.37 (SiCCCH<sub>2</sub>), 40.84 (CH<sub>2</sub>), 18.63 (CH<sub>3</sub>), 11.19 (CH).

#### (1-(3-(Triisopropylsilyl)prop-2-yn-1-yl)-1,2,3-triazol-4-yl)methanol **S4**

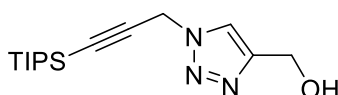

**S4**

$C_{15}H_{27}N_3OSi$   
293.49 g/mol

(1-(3-(Triisopropylsilyl)prop-2-yn-1-yl)-1,2,3-triazol-4-yl)methanol **S4** was synthesised according to a modified literature known procedure.<sup>17</sup> 12.4 g (3-Azidoprop-1-yn-1-yl)triisopropylsilane **S3** (52.0 mmol, 1.00 eq.) are dissolved in 300 mL *t*BuOH and water (1 : 1). 4.54 mL Propargyl alcohol (78.0 mmol, 1.50 eq.), copper(II)sulfate pentahydrate (10.4 mmol, 0.20 eq.) and sodium ascorbate (20.8 mmol, 0.40 eq.) are added subsequently. The orange suspension is stirred at 60 °C for 21 h. After cooling to r.t. the mixture is extracted with dichloromethane (4 x 200 mL). The united organic layers are washed with 60 mL water and 180 mL brine, dried *via* MgSO<sub>4</sub>, filtered and the volatiles are removed under reduced pressure. The brownish solid is washed with cold pentane (3 x 25 mL). After drying under vacuum, 9.14 g of the product are obtained as colourless solid (31.1 mmol, 60%).

<sup>1</sup>H-NMR (400 MHz, CDCl<sub>3</sub>):  $\delta$  [ppm] = 7.77 (s, 1 H, *H*<sub>trz</sub>), 5.22 (s, 2 H, CCH<sub>2</sub>N), 4.81 (s, 2 H, CCH<sub>2</sub>OH), 1.09 – 1.06 (m, 21 H, CH(CH<sub>3</sub>)<sub>3</sub>).

<sup>13</sup>C-NMR (400 MHz, CDCl<sub>3</sub>):  $\delta$  [ppm] = 142.94 (*C*<sub>trz</sub>CH<sub>2</sub>OH), 121.85 (*C*<sub>trz</sub>NCH<sub>2</sub>), 97.46 (SiCCCH<sub>2</sub>), 90.53 (SiCCCH<sub>2</sub>), 45.83 (CH<sub>2</sub>OH), 41.22 (NCH<sub>2</sub>C), 18.66 (CH<sub>3</sub>), 11.17 (CH<sub>3</sub>CH).

ESI-MS (*m/z*): calcd [M–H]<sup>+</sup>: 294.20; found: 294.09 [M–H]<sup>+</sup>.

#### 4-(Azidomethyl)-1-(3-(triisopropylsilyl)prop-2-yn-1-yl)-1,2,3-triazole **S5**

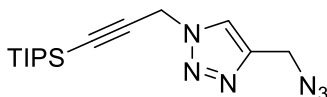

**S5**

$C_{15}H_{26}N_6Si$   
318.50 g/mol

4-(Azidomethyl)-1-(3-(triisopropylsilyl)prop-2-yn-1-yl)-1,2,3-triazole **S5** was synthesised according to a modified literature known procedure.<sup>17</sup> Under *Schlenk*-conditions 9.14 g (1-(3-(Triisopropylsilyl)prop-2-yn-1-yl)-1,2,3-triazol-4-yl)methanol **S4** (31.1 mmol, 1.00 eq.) are dissolved in 200 mL degassed dimethylformamide in a flame dried *Schlenk*-flask and cooled to 0 °C. Under stirring, 16.8 g PPh<sub>3</sub> (63.8 mmol, 2.05 eq.) are added portionwise at this temperature, whereby the solution turns brown. The mixture is stirred for further 5 min at 0 °C. Subsequently, 22.7 g carbon tetrabromide (68.5 mmol,

2.20 eq.) is added portionwise at 0 °C, whereby the solution decolours briefly and then turns brown again. The mixture is stirred for further 15 min at 0 °C. Subsequently, 6.07 g sodium azide (93.4 mmol, 3.00 eq.) is added at 0 °C, whereby the solution turns red brownish. The mixture is again stirred for further 10 min at 0 °C and allowed to warm up to room temperature. The mixture is stirred at r.t. for 1 h. At atmospheric conditions, the reaction is quenched by the addition of 200 mL water. The mixture is extracted with ethyl acetate (4 x 200 mL). The collected organic layers are washed with 130 mL brine, dried *via* MgSO<sub>4</sub>, filtered and the volatiles are removed under reduced pressure (16 mbar, 60 °C). The crude product is obtained as brown solid and purified *via* column chromatography (SiO<sub>2</sub>, *n*-hexane:EtOAc = 3:1 to 2:1, R<sub>f</sub> = 0.32). 8.99 g of the product are obtained as slight yellow oil (28.2 mmol, 91%).

<sup>1</sup>H-NMR (400 MHz, CDCl<sub>3</sub>): δ [ppm] = 7.80 (s, 1 H, H<sub>trz</sub>), 5.24 (s, 2 H, CCH<sub>2</sub>N), 4.50 (s, 2 H, CCH<sub>2</sub>N<sub>3</sub>), 1.09 – 1.07 (m, 21 H, CH(CH<sub>3</sub>)<sub>3</sub>).

<sup>13</sup>C-NMR (400 MHz, CDCl<sub>3</sub>): δ [ppm] = 142.94 (C<sub>trz</sub>CH<sub>2</sub>OH), 121.84 (C<sub>trz</sub>NCH<sub>2</sub>), 97.48 (SiCCCH<sub>2</sub>), 90.53 (SiCCCH<sub>2</sub>), 45.83 (CH<sub>2</sub>OH), 41.21 (NCH<sub>2</sub>C), 18.66 (CH<sub>3</sub>), 11.18 (CH<sub>3</sub>CH).

ESI-MS (*m/z*): calcd [M]<sup>+</sup>: 318.20, found: 318.96.

#### (1-((1-(3-(Triisopropylsilyl)prop-2-yn-1-yl)-1,2,3-triazol-4-yl)methyl)-1,2,3-triazol-4-yl)methanol **S6**

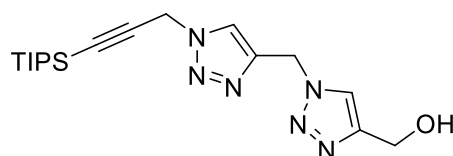

**S6**

C<sub>18</sub>H<sub>30</sub>N<sub>6</sub>OSi  
374.56 g/mol

(1-((1-(3-(Triisopropylsilyl)prop-2-yn-1-yl)-1,2,3-triazol-4-yl)methyl)-1,2,3-triazol-4-yl)methanol **S6** was synthesised according to a modified literature known procedure.<sup>17</sup> 8.99 g 4-(Azidomethyl)-1-(3-(triisopropylsilyl)prop-2-yn-1-yl)-1,2,3-triazole **S5** (28.3 mmol, 1.00 eq.) are dissolved in 250 mL *t*BuOH and water (1 : 1). 2.46 mL Propargyl alcohol (42.3 mmol, 1.50 eq.), copper(II)sulfate pentahydrate (5.65 mmol, 0.20 eq.) and sodium ascorbate (11.3 mmol, 0.40 eq.) are added subsequently. The orange suspension is stirred at 60 °C for 20 h. After cooling to r.t., the mixture is extracted with dichloromethane (1 x 300 mL and 2 x 200 mL). The united organic layers are washed with 180 mL brine, dried *via* MgSO<sub>4</sub>, filtered and the volatiles are removed under reduced pressure. After drying under vacuum, 9.14 g of the product are obtained as brownish solid (24.4 mmol, 86%). The product is used without further purification.

**<sup>1</sup>H-NMR** (400 MHz, CDCl<sub>3</sub>): δ [ppm] = 7.83 (s, 1 H, *H*<sub>trz</sub>), 7.69 (s, 1 H, *H*<sub>trz</sub>), 5.66 (s, 2 H, CCH<sub>2</sub>N), 5.21 (s, 2 H, CCH<sub>2</sub>N), 4.75 (s, 2 H, CCH<sub>2</sub>OH), 3.07 (bs, 1 H, OH), 1.07 – 1.02 (m, 21 H, CH(CH<sub>3</sub>)<sub>3</sub>).

**<sup>13</sup>C-NMR** (400 MHz, CDCl<sub>3</sub>): δ [ppm] = 148.38 (C<sub>trz</sub>CH<sub>2</sub>OH), 141.91 (C<sub>trz</sub>CH<sub>2</sub>N), 122.76 (C<sub>trz</sub>C<sub>trz</sub>CH<sub>2</sub>N), 122.11 (C<sub>trz</sub>C<sub>trz</sub>CH<sub>2</sub>OH), 97.15 (SiCCCH<sub>2</sub>), 90.77 (SiCCCH<sub>2</sub>), 56.48 (CH<sub>2</sub>OH), 45.43 (C<sub>trz</sub>CH<sub>2</sub>N), 41.29 (NCH<sub>2</sub>C), 18.62 (CH<sub>3</sub>), 11.11 (CH<sub>3</sub>CH).

**ESI-MS (*m/z*):** calcd [M–H]<sup>+</sup>: 375.23, found: 375.04.

#### 4-(Azidomethyl)-1-((1-(3-(triisopropylsilyl)prop-2-yn-1-yl)-1,2,3-triazol-4-yl)methyl)-1,2,3-triazole **S7**

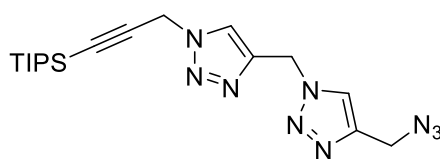

**S7**

C<sub>18</sub>H<sub>29</sub>N<sub>9</sub>Si  
399.58 g/mol

4-(Azidomethyl)-1-((1-(3-(triisopropylsilyl)prop-2-yn-1-yl)-1,2,3-triazol-4-yl)methyl)-1,2,3-triazole **S7** was synthesised according to a modified literature known procedure.<sup>17</sup> Under *Schlenk*-conditions, 9.46 g (1-((1-(3-(Triisopropylsilyl)prop-2-yn-1-yl)-1,2,3-triazol-4-yl)methyl)-1,2,3-triazol-4-yl)methanol **S6** (25.3 mmol, 1.00 eq.) are dissolved in 200 mL degassed dimethylformamide in a flame dried *Schlenk*-flask and cooled to 0 °C. Under stirring 13.6 g PPh<sub>3</sub> (51.8 mmol, 2.05 eq.) are added portion wise at this temperature, whereby the solution turns brown. The mixture is stirred for further 5 min at 0 °C. Subsequently, 18.4 g carbon tetrabromide (55.6 mmol, 2.20 eq.) is added portionwise at 0 °C, whereby the solution decolours briefly and then turns brown again. The mixture is stirred for further 15 min at 0 °C. Subsequently, 4.93 g sodium azide (75.8 mmol, 3.00 eq.) is added at 0 °C, whereby the solution turns red brownish. The mixture is again stirred for further 10 min at 0 °C and allowed to warm up to room temperature. The mixture is stirred at r.t. for another 3 h. At atmospheric conditions, the reaction is quenched by the addition of 200 mL water. The mixture is extracted with ethyl acetate (5 x 200 mL). The collected organic layers are dried *via* MgSO<sub>4</sub>, filtered and the volatiles are removed under reduced pressure (10 mbar, 60 °C). The crude product is obtained as brown solid and purified *via* column chromatography (SiO<sub>2</sub>, EtOAc: *n*-hexane = 2:1, R<sub>f</sub> = 0.5). 8.48 g of the product are obtained as yellow crystalline solid (22.2 mmol, 84%).

**<sup>1</sup>H-NMR** (400 MHz, CDCl<sub>3</sub>): δ [ppm] = 7.84 (s, 1 H, *H*<sub>trz</sub>), 7.72 (s, 1 H, *H*<sub>trz</sub>), 5.69 (s, 2 H, CCH<sub>2</sub>N), 5.21 (s, 2 H, CCH<sub>2</sub>N), 4.45 (s, 2 H, CCH<sub>2</sub>N<sub>3</sub>), 1.07 – 1.02 (m, 21 H, CH(CH<sub>3</sub>)<sub>3</sub>).

<sup>13</sup>C-NMR (400 MHz, CDCl<sub>3</sub>): δ [ppm] = 143.19 (C<sub>trz</sub>CH<sub>2</sub>N<sub>3</sub>), 141.70 (C<sub>trz</sub>CH<sub>2</sub>N), 122.70 (C<sub>trz</sub>C<sub>trz</sub>CH<sub>2</sub>N), 122.57 (C<sub>trz</sub>C<sub>trz</sub>CH<sub>2</sub>N<sub>3</sub>), 97.08 (SiCCCH<sub>2</sub>), 90.83 (SiCCCH<sub>2</sub>), 45.70 (CH<sub>2</sub>N<sub>3</sub>), 45.56 (C<sub>trz</sub>CH<sub>2</sub>N), 41.29 (NCH<sub>2</sub>C), 18.60 (CH<sub>3</sub>), 11.09 (CH<sub>3</sub>CH).

ESI-MS (*m/z*): calcd [M-H]<sup>+</sup>: 400.24, found: 400.05.

**(1-((1-((1-(3-(Triisopropylsilyl)prop-2-yn-1-yl)-1,2,3-triazol-4-yl)methyl)-1,2,3-triazol-4-yl)methyl)-1,2,3-triazol-4-yl)methanol S8**

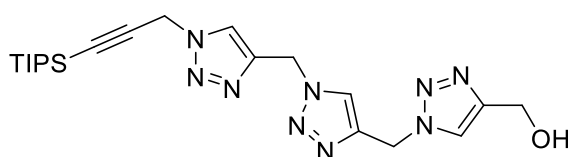

**S8**

C<sub>21</sub>H<sub>33</sub>N<sub>9</sub>OSi  
455.64 g/mol

8.48 g 4-(Azidomethyl)-1-((1-(3-(triisopropylsilyl)prop-2-yn-1-yl)-1,2,3-triazol-4-yl)methyl)-1,2,3-triazole **S7** (21.2 mmol, 1.00 eq.) are dissolved in 250 mL *t*BuOH and water (1 : 1). 1.85 mL propargyl alcohol (31.8 mmol, 1.50 eq.), 1.06 g copper(II)sulfate pentahydrate (4.24 mmol, 0.20 eq.) and 1.68 g sodium ascorbate (8.49 mmol, 0.40 eq.) are added subsequently. The yellow suspension is stirred at 60 °C for 15 h. After cooling to r.t., the orange mixture is diluted with 85 mL water and extracted with dichloromethane (3 x 200 mL and 1 x 100 mL). The united organic layers are washed with 60 mL brine, dried *via* MgSO<sub>4</sub>, filtered and the volatiles are removed under reduced pressure. The brown oil is washed with pentane 3 x 20 mL, which forms a colourless solid. After drying under vacuum, 9.24 g of the product are obtained as off-white solid (20.3 mmol, 96%).

<sup>1</sup>H-NMR (400 MHz, CDCl<sub>3</sub>): δ [ppm] = 7.87 (s, 1 H, H<sub>trz</sub>), 7.81 (s, 1 H, H<sub>trz</sub>), 7.70 (s, 1 H, H<sub>trz</sub>), 5.67 (s, 2 H, CCH<sub>2</sub>N), 5.63 (s, 2 H, CCH<sub>2</sub>N), 5.22 (s, 2 H, CCH<sub>2</sub>N), 4.74 (s, 2 H, CCH<sub>2</sub>OH), 1.08 – 1.03 (m, 21 H, CH(CH<sub>3</sub>)<sub>3</sub>).

<sup>1</sup>H-NMR (400 MHz, DMSO-*d*<sub>6</sub>): δ [ppm] = 8.19 (s, 2 H, H<sub>trz</sub>), 7.97 (s, 1 H, H<sub>trz</sub>), 5.71 (s, 2 H, CCH<sub>2</sub>N), 5.64 (s, 2 H, CCH<sub>2</sub>N), 5.42 (s, 2 H, CCH<sub>2</sub>N), 5.18 (t, <sup>3</sup>J = 5.5 Hz, 1 H, OH) 4.47 (d, <sup>3</sup>J = 5.5 Hz, 2 H, CCH<sub>2</sub>OH), 1.02 – 0.99 (m, 21H, CH(CH<sub>3</sub>)<sub>3</sub>).

<sup>13</sup>C-NMR (400 MHz, DMSO-*d*<sub>6</sub>): δ [ppm] = 148.37 (C<sub>trz</sub>CH<sub>2</sub>OH), 141.98 (C<sub>trz</sub>CH<sub>2</sub>N), 141.73 (C<sub>trz</sub>CH<sub>2</sub>N), 124.18 (C<sub>trz</sub>C<sub>trz</sub>CH<sub>2</sub>N), 124.01 (C<sub>trz</sub>C<sub>trz</sub>CH<sub>2</sub>N), 122.79 (C<sub>trz</sub>C<sub>trz</sub>CH<sub>2</sub>OH), 100.67 (SiCCCH<sub>2</sub>), 86.90 (SiCCCH<sub>2</sub>), 55.05 (C<sub>trz</sub>CH<sub>2</sub>N) 54.92 (CH<sub>2</sub>OH), 44.53 (CCH<sub>2</sub>N), 44.38 (C<sub>trz</sub>CH<sub>2</sub>N), 18.38 (CH<sub>3</sub>), 10.55 (CH<sub>3</sub>CH).

ESI-MS (*m/z*): calcd [M-H]<sup>+</sup>: 456.27, found: 456.07.

**4-(Azidomethyl)-1-((1-((1-(3-(triisopropylsilyl)prop-2-yn-1-yl)-1,2,3-triazol-4-yl)methyl)-1,2,3-triazol-4-yl)methyl)-1,2,3-triazole S9**

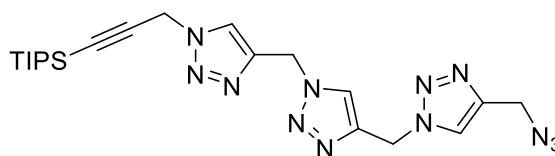

**S9**

C<sub>21</sub>H<sub>32</sub>N<sub>12</sub>Si  
480.66 g/mol

Under *Schlenk*-conditions 9.24 g (1-((1-((1-(3-(Triisopropylsilyl)prop-2-yn-1-yl)-1,2,3-triazol-4-yl)methyl)-1,2,3-triazol-4-yl)methyl)-1,2,3-triazol-4-yl)methanol **S8** (20.3 mmol, 1.00 eq.) are dissolved in 250 mL degassed dimethylformamide in a flame dried *Schlenk*-flask and cooled to 0 °C. Under stirring, 10.9 g PPh<sub>3</sub> (41.6 mmol, 2.05 eq.) are added portionwise at this temperature, whereby the solution turns brown. The mixture is stirred for further 5 min at 0 °C. Subsequently, 14.8 g carbon tetrabromide (44.6 mmol, 2.20 eq.) is added portionwise at 0 °C, whereby the solution decolours briefly and then turns brown again. The mixture is stirred for further 15 min at 0 °C. Subsequently, 3.96 g sodium azide (60.8 mmol, 3.00 eq.) is added at 0 °C, whereby the solution turns red brownish. The mixture is again stirred for further 10 min at 0 °C and allowed to warm up to room temperature. The mixture is stirred at r.t. for 3 h. At atmospheric conditions, the reaction is quenched by the addition of 250 mL water. The mixture is extracted with ethyl acetate (1 x 400 mL and 2 x 200 mL). The collected organic layers are washed with 150 mL brine, dried *via* MgSO<sub>4</sub>, filtered and the volatiles are removed under reduced pressure. The crude product is obtained as brown solid and purified *via* column chromatography (SiO<sub>2</sub>, Acetone: *n*-hexane = 2:1, R<sub>f</sub> = 0.81). Subsequent washing with 80 mL cold ethyl acetate obtains 4.55 g of the product as white solid (9.46 mmol, 46%).

<sup>1</sup>H-NMR (400 MHz, CDCl<sub>3</sub>): δ [ppm] = 7.85 (s, 1 H, H<sub>trz</sub>), 7.77 (s, 1H, H<sub>trz</sub>), 7.71 (s, 1 H, H<sub>trz</sub>), 5.67 (s, 2 H, CCH<sub>2</sub>N), 5.65 (s, 2 H, CCH<sub>2</sub>N), 5.22 (s, 2 H, CCH<sub>2</sub>N), 4.46 (s, 2 H, CCH<sub>2</sub>OH), 1.09 – 1.04 (m, 21 H, CH(CH<sub>3</sub>)<sub>3</sub>).

<sup>1</sup>H-NMR (400 MHz, CD<sub>3</sub>CN): δ [ppm] = 7.94 (s, 1 H, H<sub>trz</sub>), 7.90 (s, 1 H, H<sub>trz</sub>), 7.85 (s, 1 H, H<sub>trz</sub>), 5.64 (s, 2 H, CCH<sub>2</sub>N), 5.62 (s, 2 H, CCH<sub>2</sub>N), 5.21 (s, 2 H, CCH<sub>2</sub>N), 4.42 (s, 2 H, CCH<sub>2</sub>OH), 1.08 – 1.02 (m, 21 H, CH(CH<sub>3</sub>)<sub>3</sub>).

<sup>13</sup>C-NMR (400 MHz, CD<sub>3</sub>CN): δ [ppm] = 143.45 (C<sub>trz</sub>CH<sub>2</sub>N<sub>3</sub>), 142.88 (C<sub>trz</sub>CH<sub>2</sub>N), 142.85 (C<sub>trz</sub>CH<sub>2</sub>N), 124.68 (C<sub>trz</sub>C<sub>trz</sub>CH<sub>2</sub>N), 124.41 (C<sub>trz</sub>C<sub>trz</sub>CH<sub>2</sub>N), 124.38 (C<sub>trz</sub>C<sub>trz</sub>CH<sub>2</sub>N<sub>3</sub>), 100.41 (SiCCCH<sub>2</sub>), 89.05 (SiCCCH<sub>2</sub>), 46.02 (SiCCCH<sub>2</sub>) 45.97 (C<sub>trz</sub>CH<sub>2</sub>N), 45.96 (C<sub>trz</sub>CH<sub>2</sub>N), 41.53 (CH<sub>2</sub>N<sub>3</sub>), 18.82 (CH<sub>3</sub>), 11.82 (CH<sub>3</sub>CH).

ESI-MS (*m/z*): calcd [M-H]<sup>+</sup>: 481.27, found: 481.04.



## Calix[4]1,2,3-triazole a

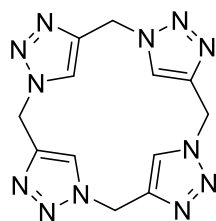

**a**

$C_{12}H_{12}N_{12}$   
324.31 g/mol

Calix[4]1,2,3-triazole **a** was synthesised according to a modified literature known procedure.<sup>17</sup> Under *Schlenk*-conditions, 500 mg 4-(azidomethyl)-1-((1-((1-(3-(triisopropylsilyl)prop-2-yn-1-yl)-1,2,3-triazol-4-yl)methyl)-1,2,3-triazol-4-yl)methyl)-1,2,3-triazole **S9** (1.54 mmol, 1.00 eq.) are dissolved in 1070 mL degassed DMF. 604 mg potassium fluoride (10.4 mmol, 10.0 eq.), 353  $\mu$ L of an 48% hydrogen bromide solution in water (3.12 mmol, 3.00 eq.) and 119 mg copper(I) iodide (624  $\mu$ mol, 0.60 eq.) are added. The mixture is stirred for 4 d at r.t. until a colourless solid precipitates. All volatiles are removed under reduced pressure. The solid is washed with 60 mL methanol, 60 mL of a semi-concentrated aqueous ammonia solution, 2 x 30 mL water, 60 mL methanol and 60 mL diethyl ether. Residual solvent was removed *via* high vacuum. 308 mg of the product are obtained as white solid (0.96 mmol, 93%). Due to the low solubility of the product in any solvents, only  $^1\text{H-NMR}$  spectrometry was applied.

$^1\text{H-NMR}$  (400 MHz,  $\text{DMSO-}d_6$ ):  $\delta$  [ppm] = 7.71 (s, 4 H,  $H_{\text{trz}}$ ), 5.67 (s, 8 H,  $\text{CH}_2$ ).

**Analytical calculation** (%) for  $C_{12}H_{12}N_{12}$ : C 44.44; H 3.73; N 51.83. Found: C 44.45; H 3.70; N 50.52.

## 4.2 Synthesis of calix[4]3-methyl-1,2,3-triazolium salts b and c

### Calix[4]3-methyl-1,2,3-triazolium triflate b

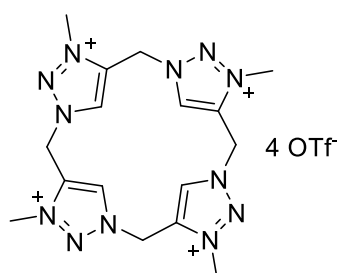

**b**

$C_{20}H_{24}F_{12}N_{12}O_{12}S_4$   
980.70 g/mol

Under *Schlenk*-conditions, 500 mg calix[4]1,2,3-triazole **a** (1.54 mmol, 1.00 eq.) are suspended in 10 mL dry and degassed acetonitrile. 3.49 mL of trifluoromethanesulfonate (30.8 mmol, 20.0 eq.) are added and the reaction mixture is stirred at room temperature. After 5 min the solid is solved and after

another 5 min a colourless solid participates again. The mixture is heated to 60 °C until everything is dissolved. After subsequent cooling to 40 °C the mixture is stirred for another 3 d at 40 °C. After cooling to room temperature, the colourless solid is separated from the orange solution by centrifugation at atmospheric conditions and washed with acetonitrile (3 x 2 mL) and diethyl ether (1 x 10 mL). After drying under high vacuum, 1.09 g of the product are obtained as colourless solid (1.11 mmol, 72%).

$^1\text{H-NMR}$  (400 MHz,  $\text{CD}_3\text{CN}$ ):  $\delta$  [ppm] = 8.73 (s, 4 H,  $H_{\text{trz}}$ ), 6.21 (s, 8 H,  $\text{CH}_2$ ), 4.37 (s, 12 H,  $\text{CH}_3$ ).

$^{13}\text{C-NMR}$  (400 MHz,  $\text{CD}_3\text{CN}$ ):  $\delta$  [ppm] = 139.60 ( $\text{C}_{\text{trzCH}_2\text{N}}$ ), 131.80 ( $\text{NC}_{\text{trz}}\text{HC}_{\text{trz}}\text{CH}_2$ ), 46.95 ( $\text{CH}_2$ ), 40.61 ( $\text{CH}_3$ ).

$^{19}\text{F-NMR}$  (400 MHz,  $\text{CD}_3\text{CN}$ ):  $\delta$  [ppm] = -79.23 (s, 12 F).

**ESI-MS ( $m/z$ ):** calcd [ $\text{M-H}_4^{4+}\text{OTf}^-$ ] $^{3+}$ : 179.07, found: 179.03; calcd [ $\text{M-H}_4^{4+}2\text{OTf}^-$ ] $^{2+}$ : 343.08, found: 344.02; calcd [ $\text{M-H}_4^{6+}4\text{OTf}^-$ ] $^{2+}$ : 492.03 found: 493.89; calcd [ $\text{M}^{4+}3\text{OTf}^-$ ] $^{1+}$ : 831.08, found: 830.56.

#### Calix[4]3-methyl-1,2,3-triazolium hexafluorophosphate **c**

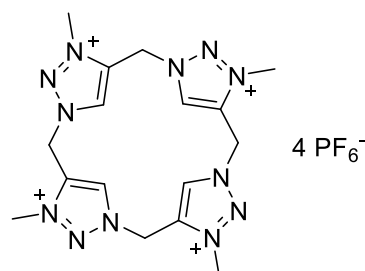

**c**

$\text{C}_{16}\text{H}_{24}\text{F}_{24}\text{N}_{12}\text{P}_4$   
964.31 g/mol

1.09 g Calix[4]3-methyl-1,2,3-triazolium triflate **b** (1.11 mmol, 1.00 eq.) are dissolved in 50 mL water and dropwise added to a solution of 2.71 g Ammonium hexafluorophosphate (16.6 mmol, 15.0 eq.) in 20 mL water. The precipitated colourless solid is separated *via* centrifugation of the reaction mixture and washed with  $\text{H}_2\text{O}$  (2 x 5 mL), cold MeOH (10 mL) and  $\text{Et}_2\text{O}$  (10 mL). After drying under vacuum, 1.07 g of the product (1.11 mmol, 100%) are obtained as colourless solid.

$^1\text{H-NMR}$  (400 MHz,  $\text{CD}_3\text{CN}$ ):  $\delta$  [ppm] = 8.36 (s, 4 H,  $H_{\text{trz}}$ ), 6.23 (s, 8 H,  $\text{CH}_2$ ), 4.38 (s, 12 H,  $\text{CH}_3$ ).

$^{13}\text{C-NMR}$  (400 MHz,  $\text{CD}_3\text{CN}$ ):  $\delta$  [ppm] = 139.45 ( $\text{C}_{\text{trzCH}_2\text{N}}$ ), 131.41 ( $\text{NC}_{\text{trz}}\text{HC}_{\text{trz}}\text{CH}_2$ ), 46.43 ( $\text{CH}_2$ ), 40.50 ( $\text{CH}_3$ ).

$^{19}\text{F-NMR}$  (400 MHz,  $\text{CD}_3\text{CN}$ ):  $\delta$  [ppm] = -73.01 (d,  $^2J = 707.28$ , 24 F).

$^{31}\text{P-NMR}$  (400 MHz,  $\text{CD}_3\text{CN}$ ):  $\delta$  [ppm] = -144.88 (hept,  $^2J = 707.91$ , 4 P).

**Analytical calculation (%)** for  $C_{16}H_{24}N_{12}P_4$ : C 19.69; H 2.51; N 17.43. Found: C 19.80; H 2.54; N 16.44.

### 4.3 Synthesis of iron(II) calix[4]3-methyl-1,2,3-triazol-5-ylidene hexafluorophosphate 2

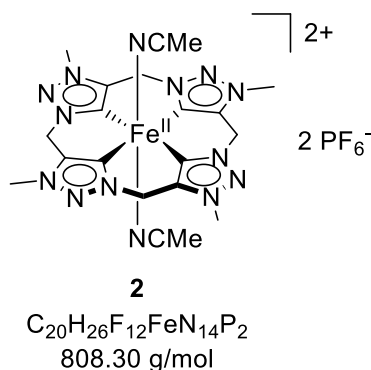

Under *Schlenk*-conditions 93.1 mg  $Fe(btsa)_2(THF)$  (207  $\mu$ mol, 2.00 eq.) are dissolved in 3 mL dry and degassed acetonitrile and cooled to  $-40$  °C. In another *Schlenk*-tube, 100 mg calix[4]3-methyl-1,2,3-triazolium hexafluorophosphate **c** (104  $\mu$ mol, 1.00 eq.) are dissolved in 4 mL dry and degassed acetonitrile and also cooled to  $-40$  °C. Under stirring, the cold ligand solution was added to the cold iron precursor solution *via* transfer cannula. The mixture is slowly allowed to warm up to room temperature, while the solution turns from light yellowish over orange to orange-brownish within minutes. After 3 h of stirring, an orange solid begins to precipitate. The mixture is stirred for further 16 h at room temperature. Subsequently, the orange solid is separated from the brown solution *via* *Whatman*-filtration and washed first with dry and degassed acetonitrile (1 x 0.5 mL) and dry and degassed diethyl ether (3 x 1 mL). After drying under vacuum, 74.4 mg of the product (92.2  $\mu$ mol, 78%) are obtained as orange solid.

**$^1H$ -NMR** (400 MHz,  $CD_3CN$ ):  $\delta$  [ppm] = 6.12 (s, 8 H,  $CH_2$ ), 4.21 (s, 12 H,  $CH_3$ ), 1.96 (s, 6 H,  $CH_3CN$ ).

**$^{13}C$ -NMR** (400 MHz,  $CD_3CN$ ):  $\delta$  [ppm] = 190.35 ( $C_{\text{carbene}}$ ), 138.88 ( $C_{\text{trz-}CH_2N}$ ), 49.05 ( $CH_2$ ), 37.08 ( $CH_3$ ).

**$^{31}P$ -NMR** (400 MHz,  $CD_3CN$ ):  $\delta$  [ppm] = -144.62 (hept,  $^2J = 707.91$ , 4 P).

**ESI-MS ( $m/z$ )**: calcd  $[M]^{2+}$ : 218.06; found: 217.64  $[M]^{2+}$ ; calcd  $[M^{2+}PF_6^-]^+$ : 581.09; found: 580.68  $[M^{2+}PF_6^-]^+$ ; calcd  $[M-H_3^{2+}PF_6^-MeCN]^+$ : 625.14; found: 625.57  $[M-H_3^{2+}PF_6^-MeCN]^+$ .

**Analytical calculation (%)** for  $C_{20}H_{26}F_{12}FeN_{14}P_2 \cdot 0.45C_4H_{10}O$ : C 31.11; H 3.65; N 23.30. Found: C 30.87; H 3.40; N 23.12.



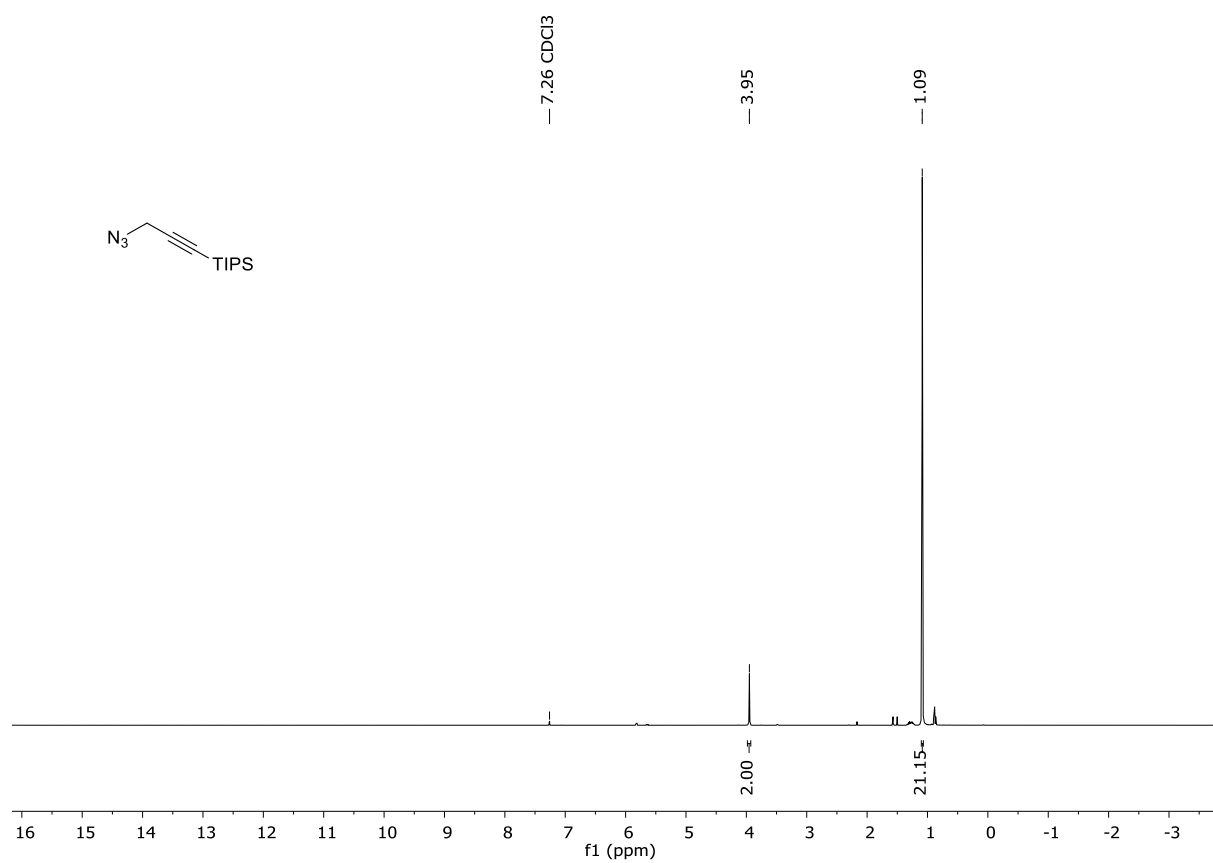

**Fig. S7**  $^1\text{H-NMR}$  spectrum of **S3** in  $\text{CDCl}_3$ .

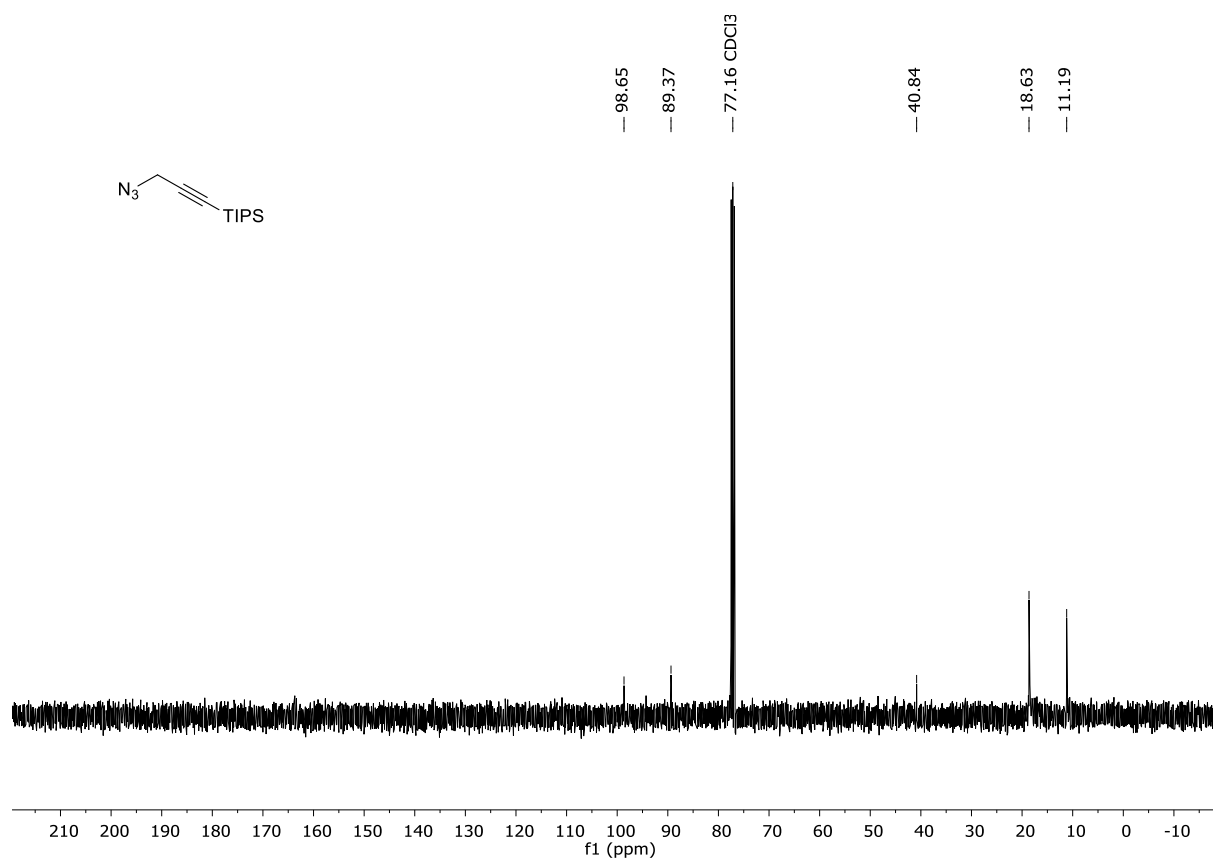

**Fig. S8**  $^{13}\text{C-NMR}$  spectrum of **S3** in  $\text{CDCl}_3$ .

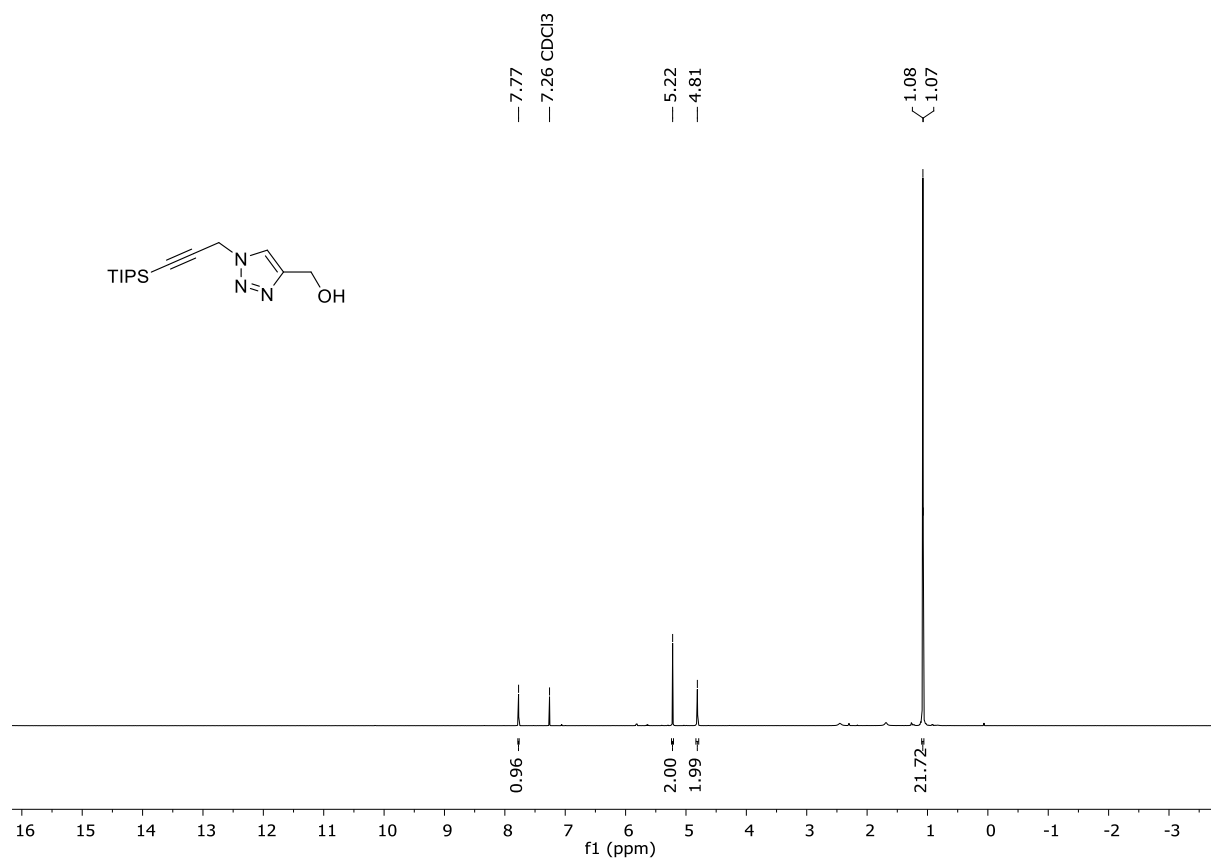

**Fig. S9** <sup>1</sup>H-NMR spectrum of **S4** in CDCl<sub>3</sub>.

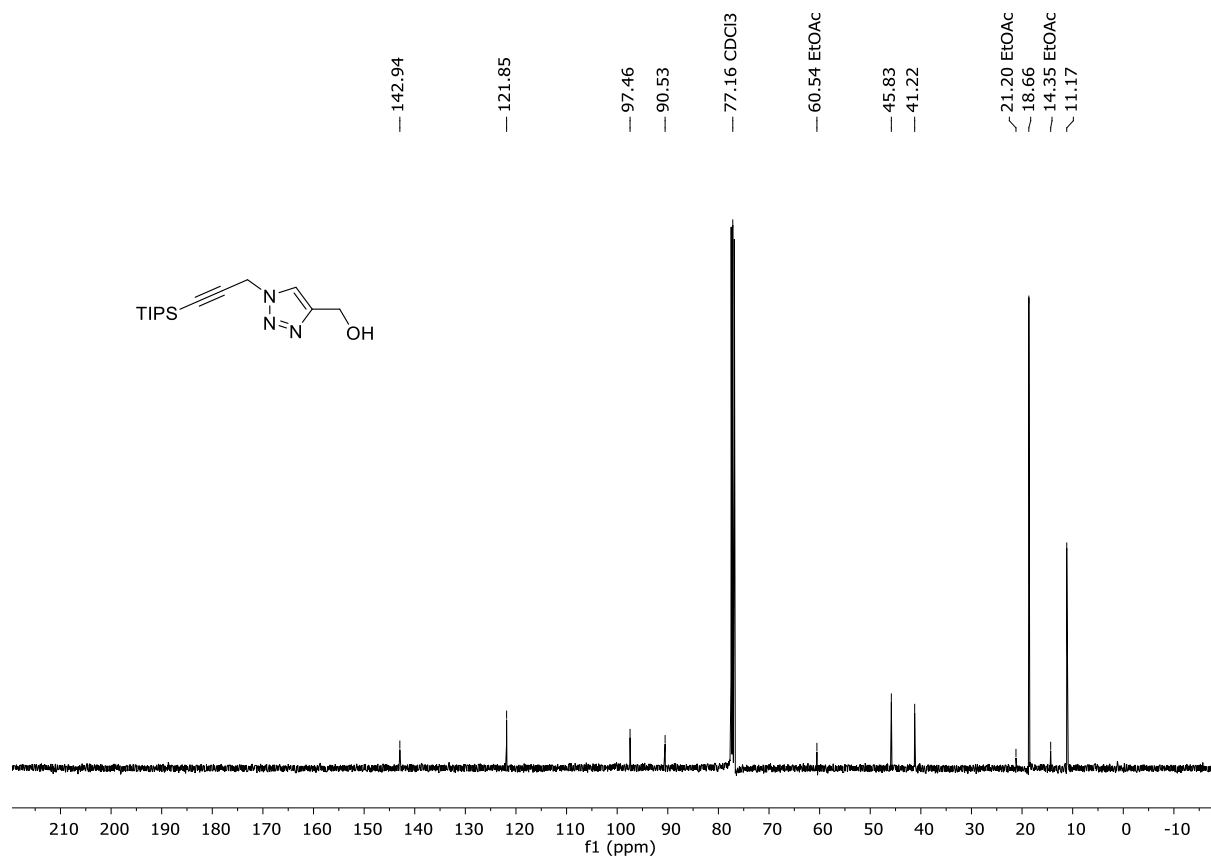

**Fig. S10** <sup>13</sup>C-NMR spectrum of **S4** in CDCl<sub>3</sub>.

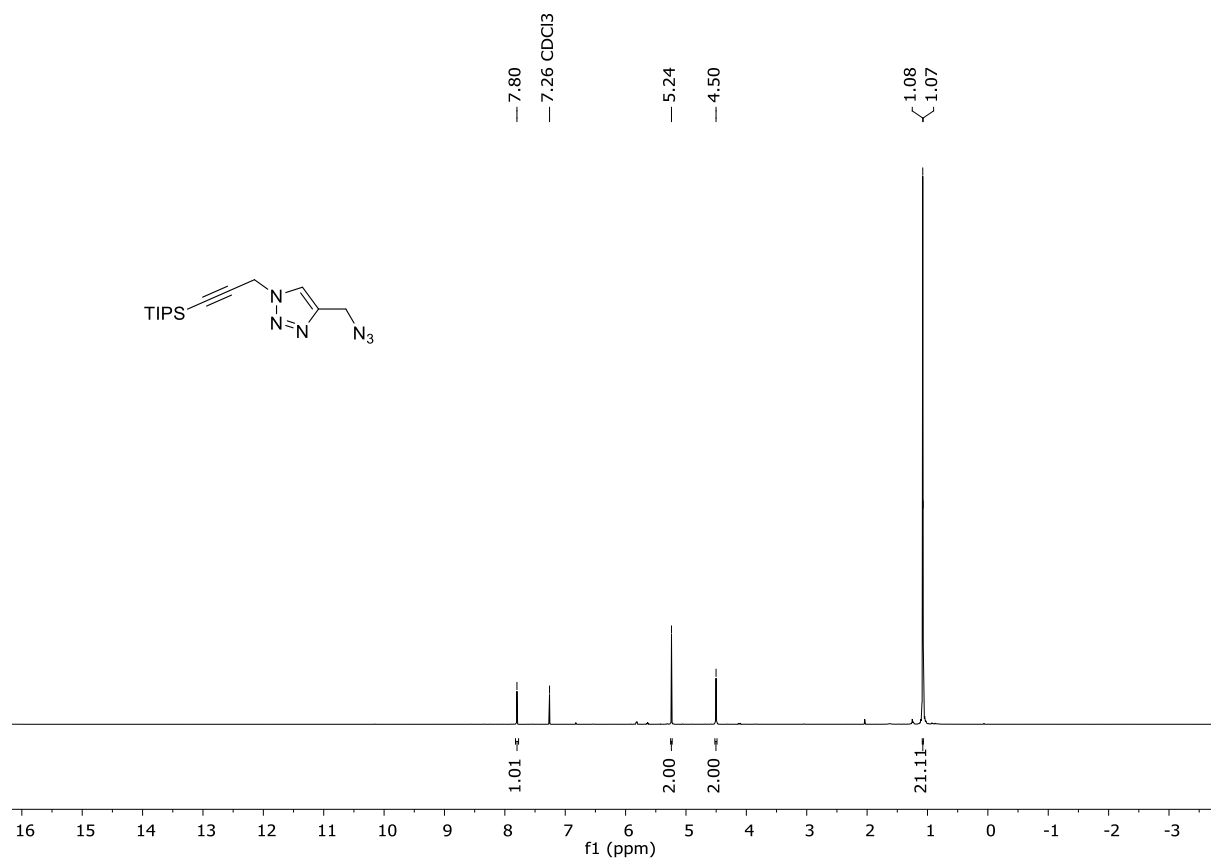

**Fig. S11** <sup>1</sup>H-NMR spectrum of **S5** in CDCl<sub>3</sub>.

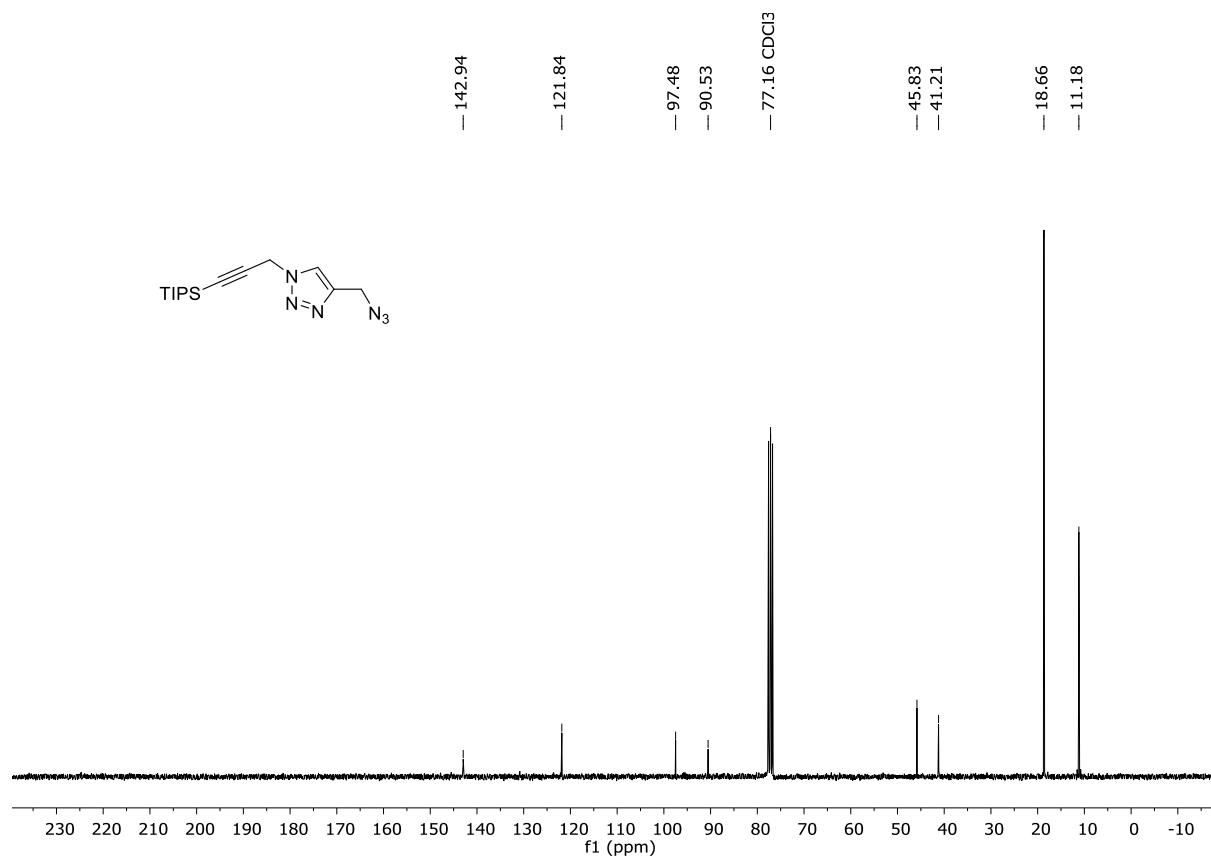

**Fig. S12** <sup>13</sup>C-NMR spectrum of **S5** in CDCl<sub>3</sub>.

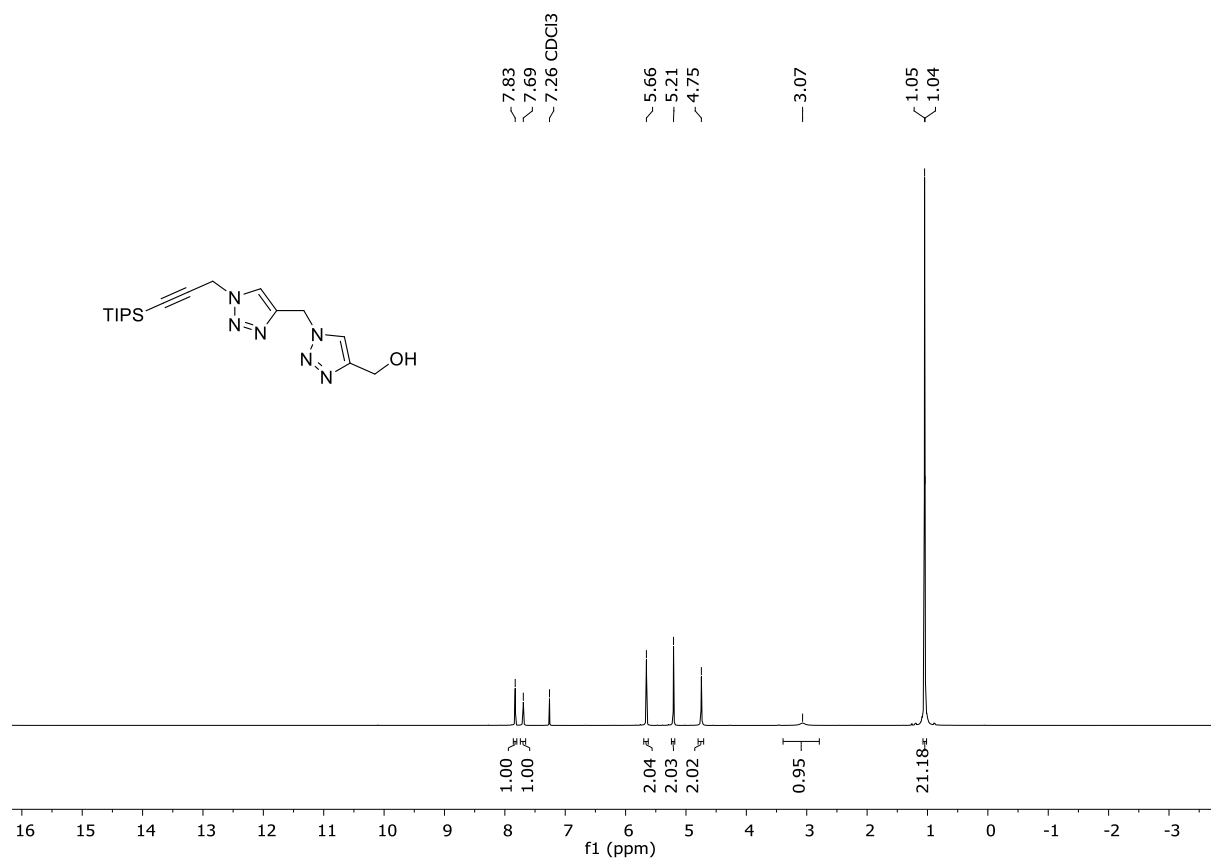

**Fig. S13** <sup>1</sup>H-NMR spectrum of **S6** in CDCl<sub>3</sub>.

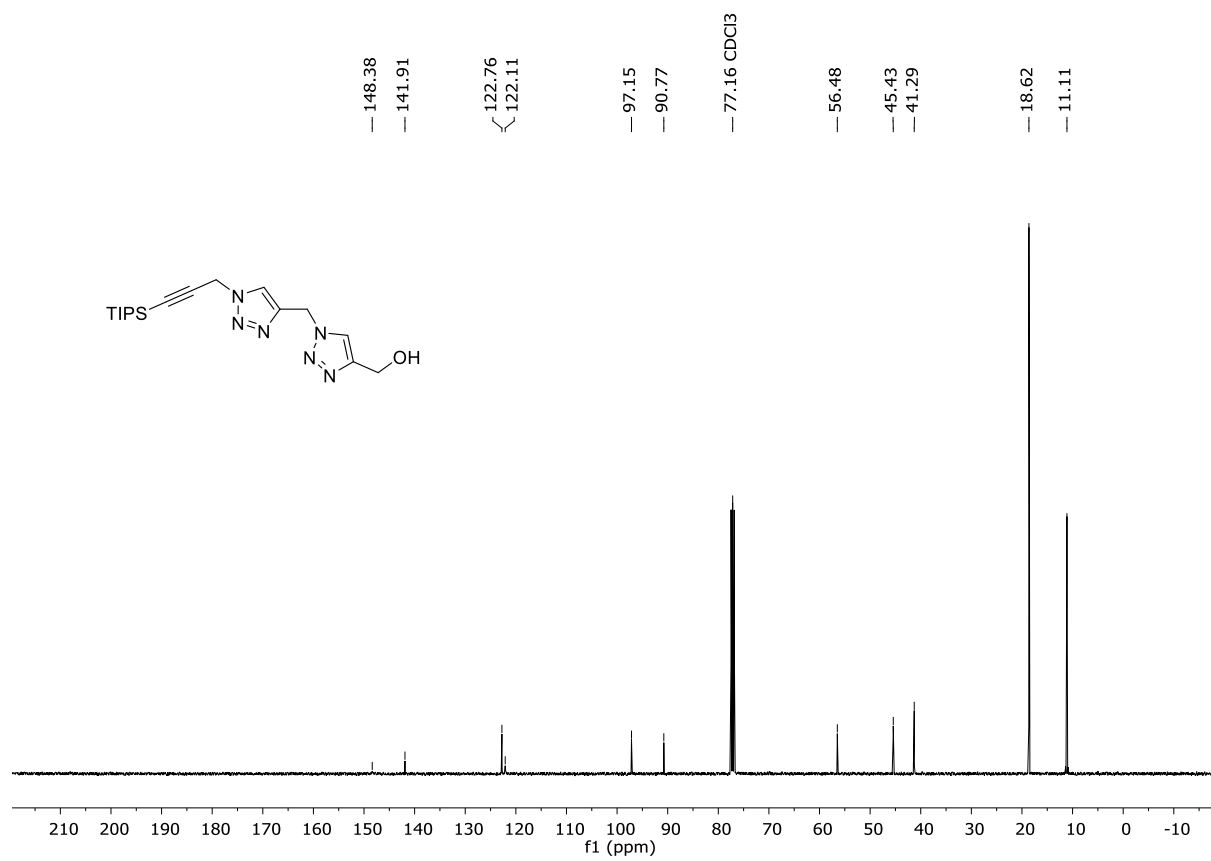

**Fig. S14** <sup>13</sup>C-NMR spectrum of **S6** in CDCl<sub>3</sub>.



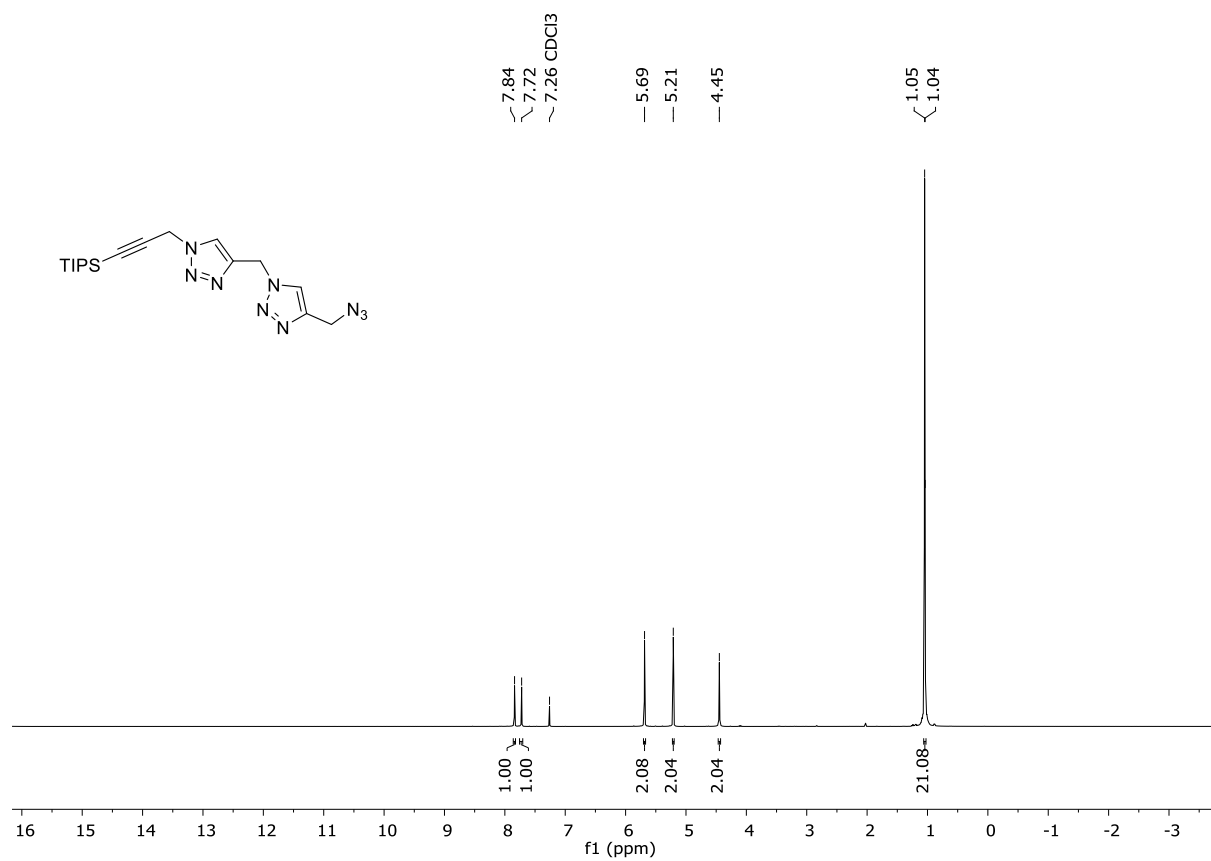

**Fig. S15** <sup>1</sup>H-NMR spectrum of **S7** in CDCl<sub>3</sub>.

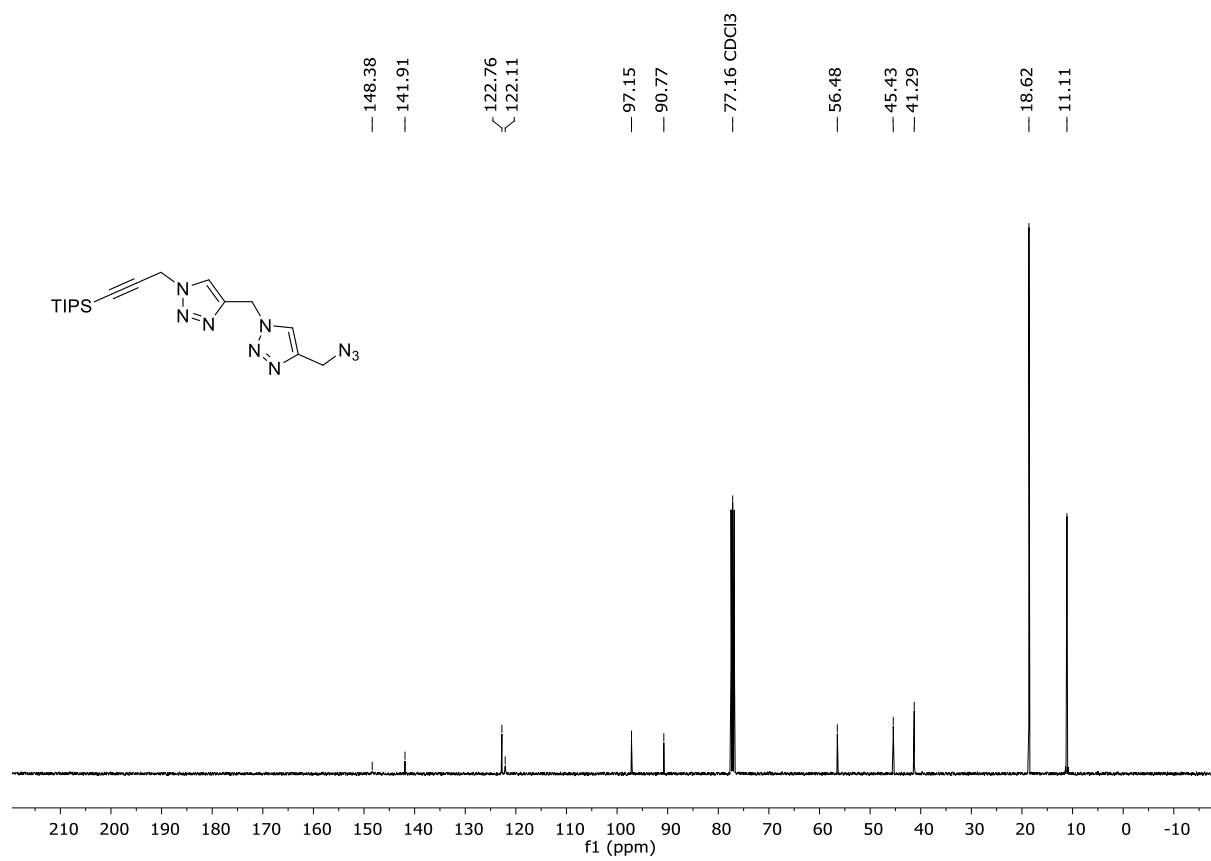

**Fig. S16** <sup>13</sup>C-NMR spectrum of **S7** in CDCl<sub>3</sub>.



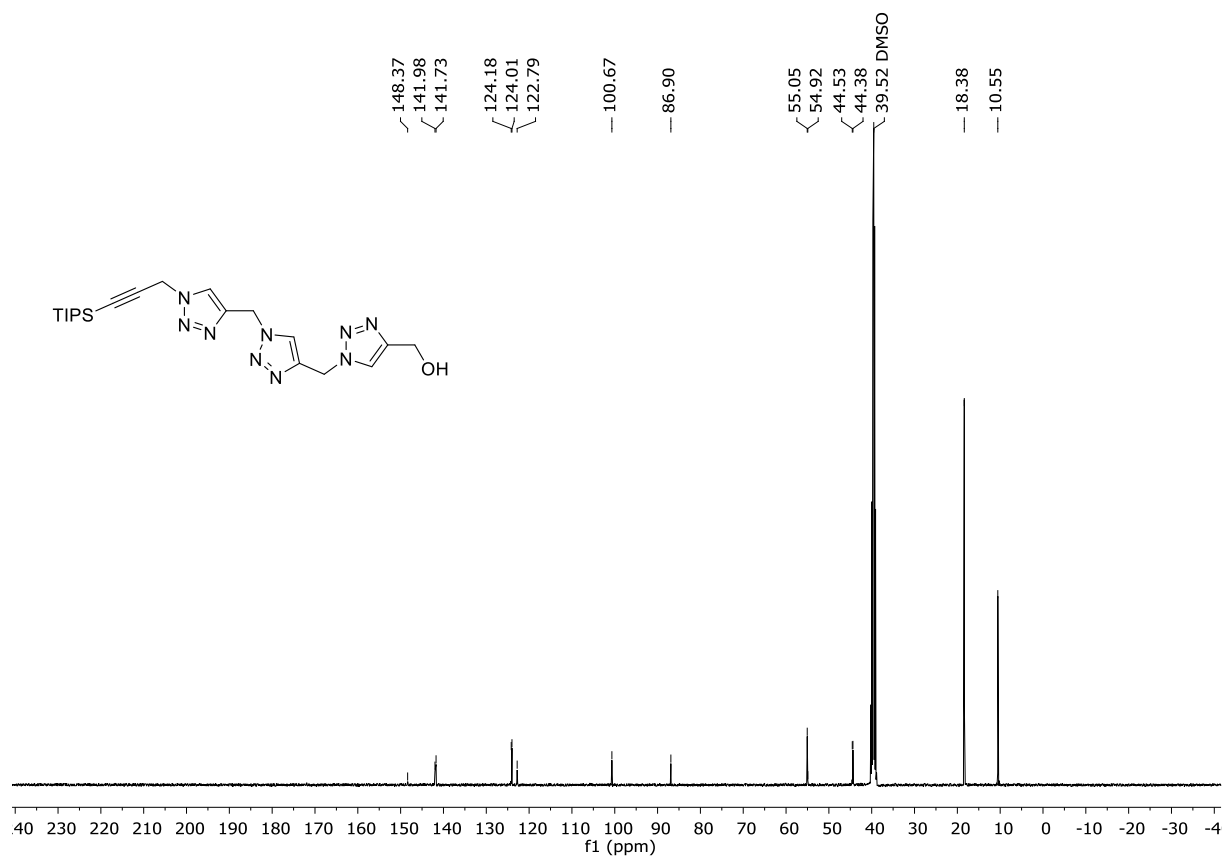

**Fig. S19** <sup>13</sup>C-NMR spectrum of **8** in DMSO-*d*<sub>6</sub>.

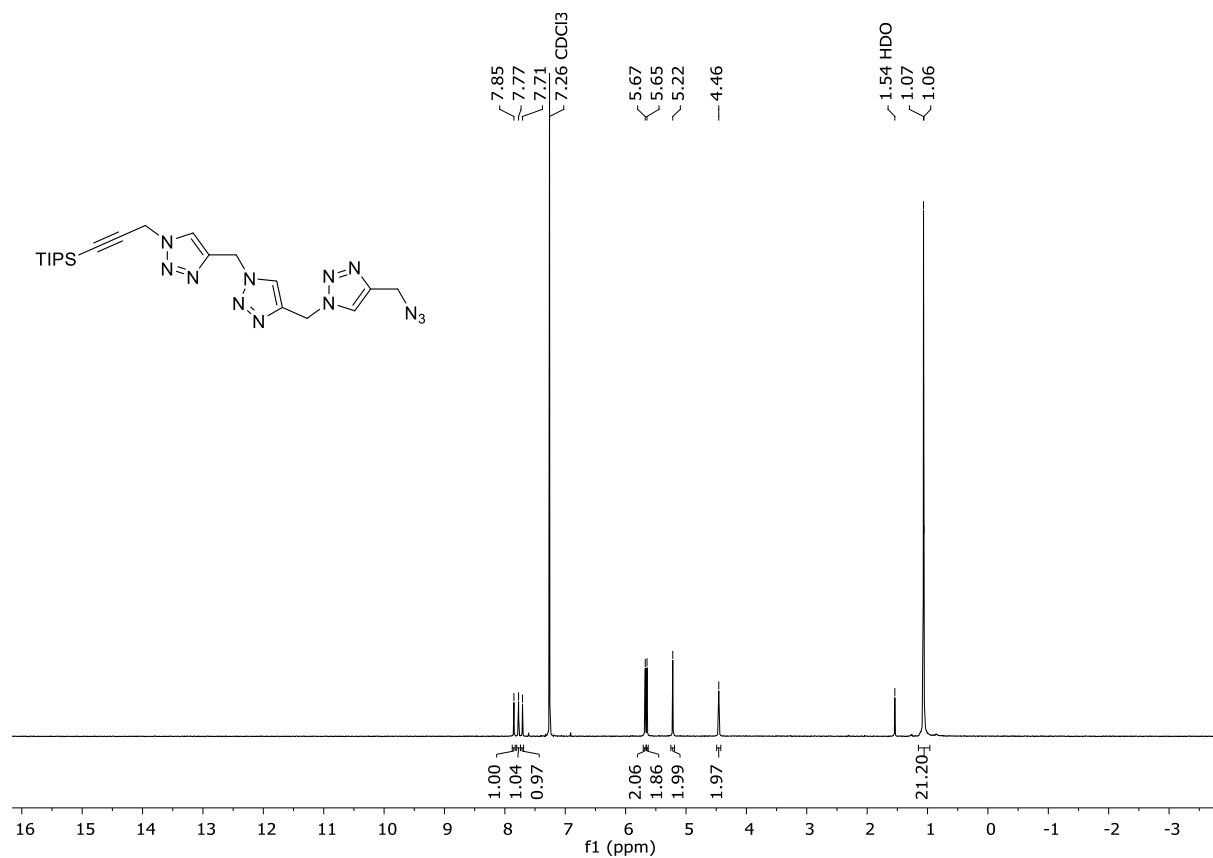

**Fig. S20** <sup>1</sup>H-NMR spectrum of **9** in CDCl<sub>3</sub>.

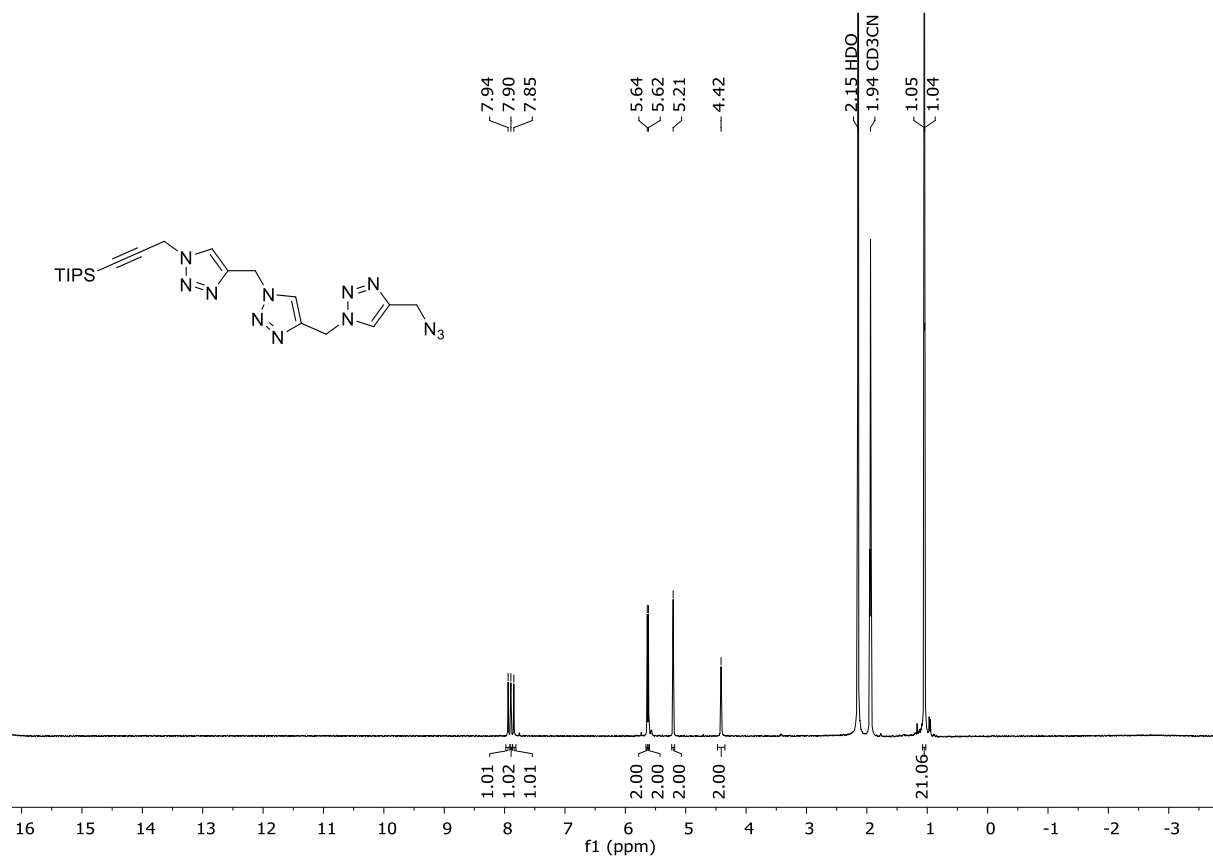

Fig. S21 <sup>1</sup>H-NMR spectrum of S9 in CD<sub>3</sub>CN.

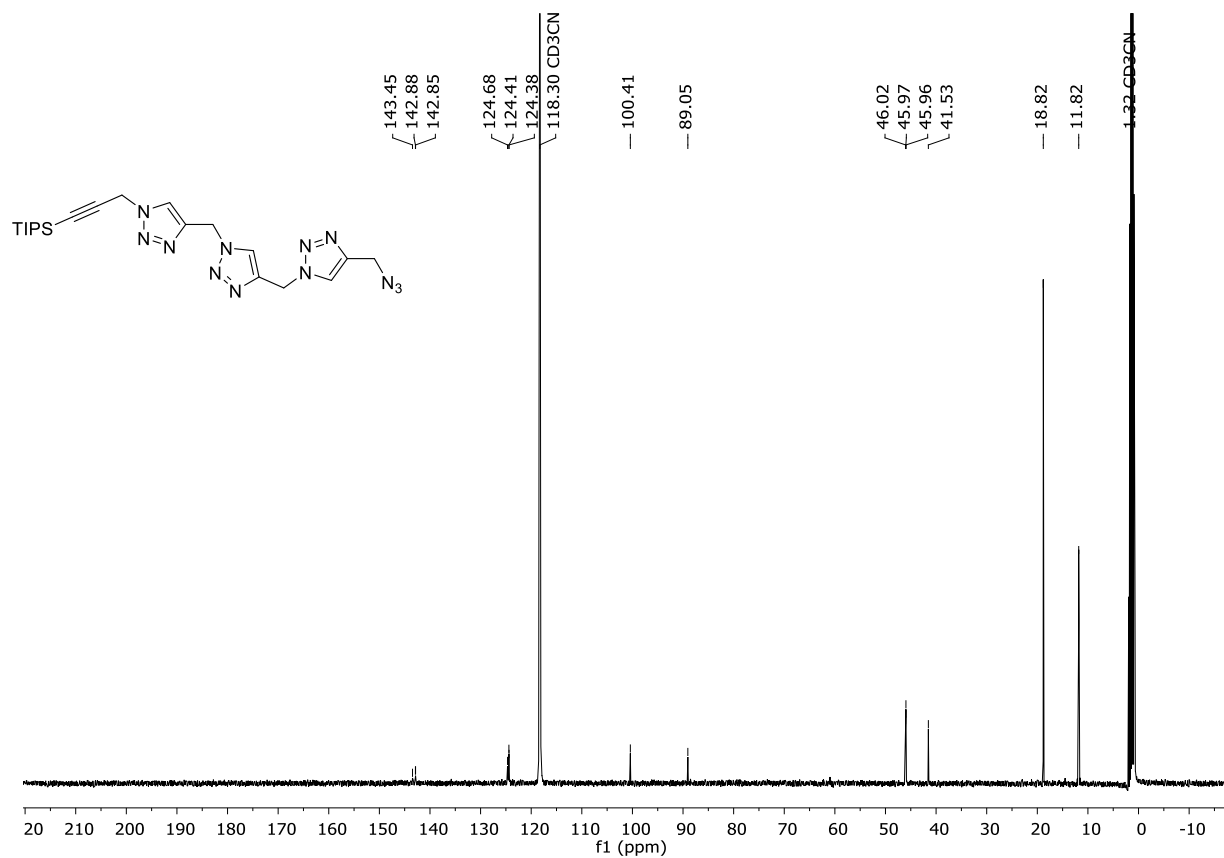

Fig. S22 <sup>13</sup>C-NMR spectrum of S9 in CD<sub>3</sub>CN.

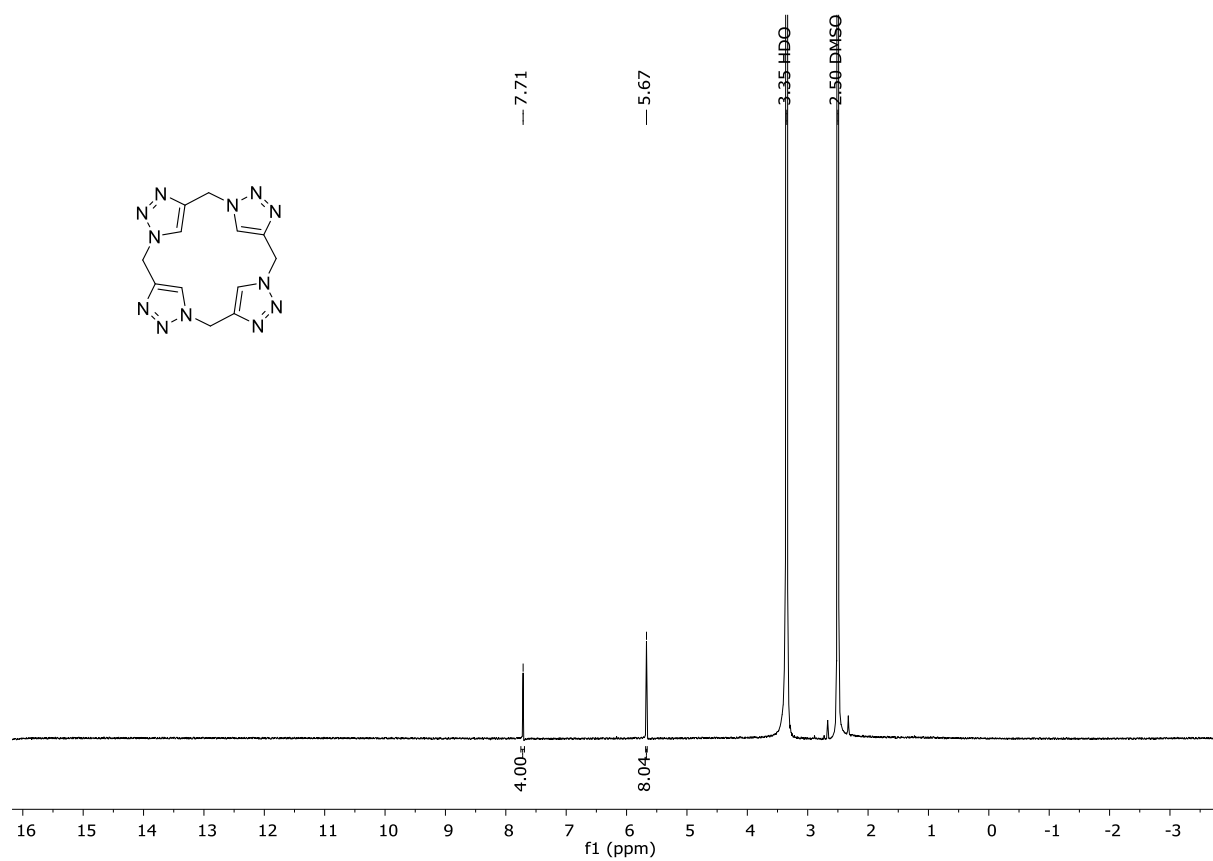

**Fig. S23**  $^1\text{H-NMR}$  spectrum of **a** in  $\text{DMSO-}d_6$ .

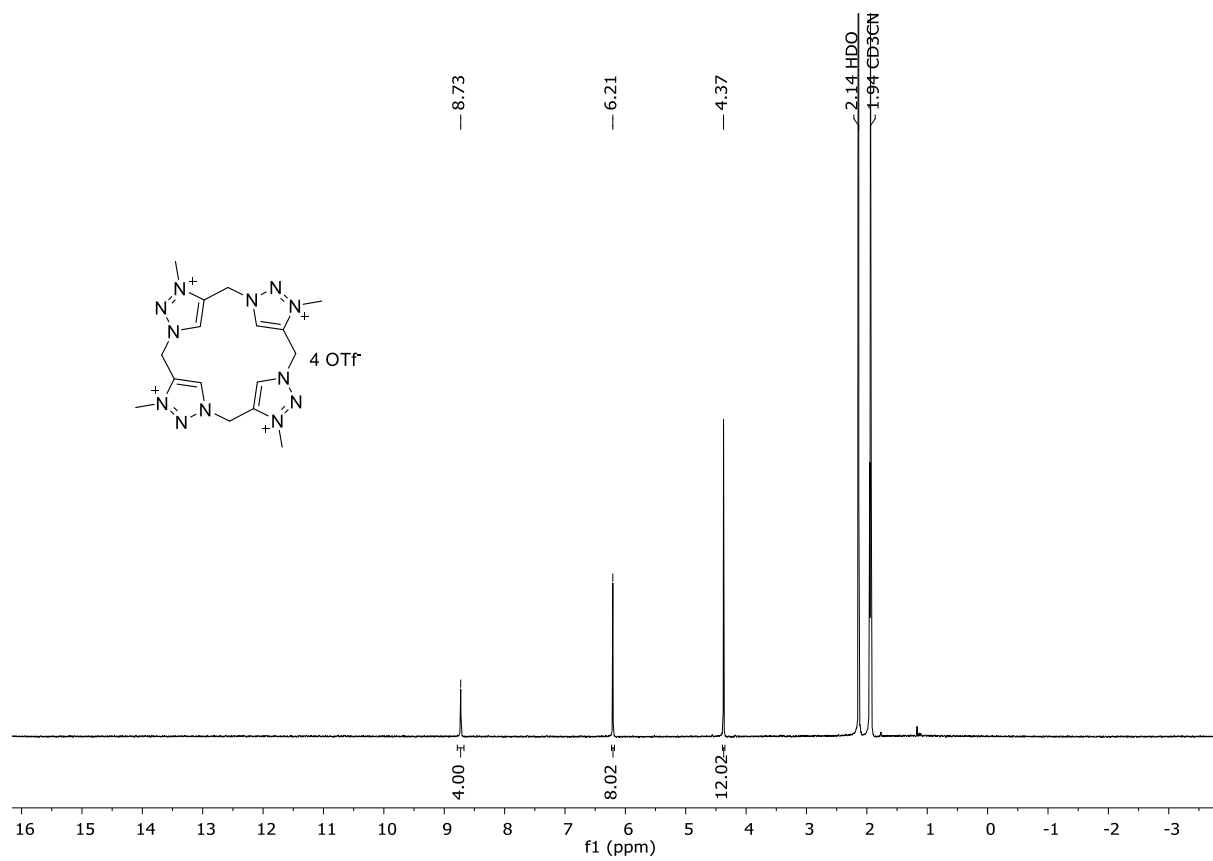

**Fig. S24**  $^1\text{H-NMR}$  spectrum of **b** in  $\text{CD}_3\text{CN}$ .

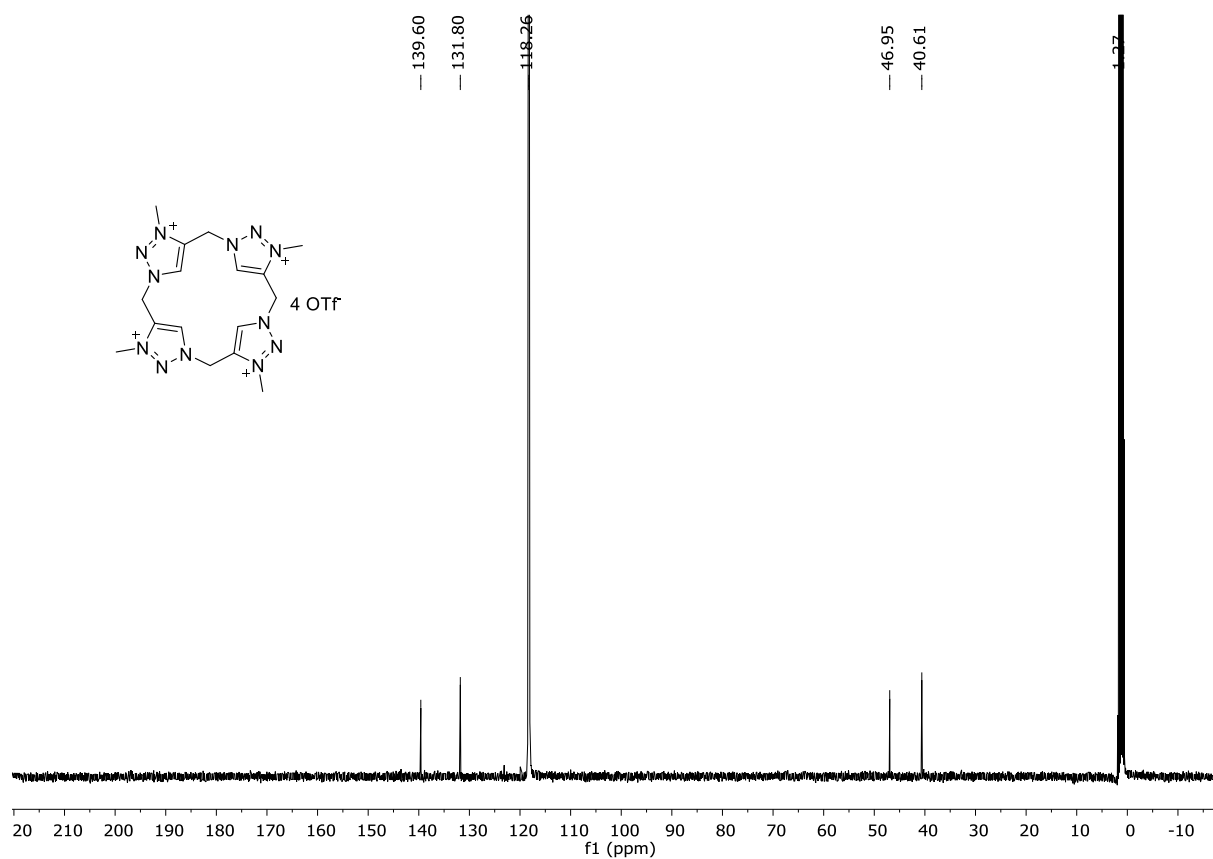

Fig. S25  $^{13}\text{C}$ -NMR spectrum of **b** in  $\text{CD}_3\text{CN}$ .

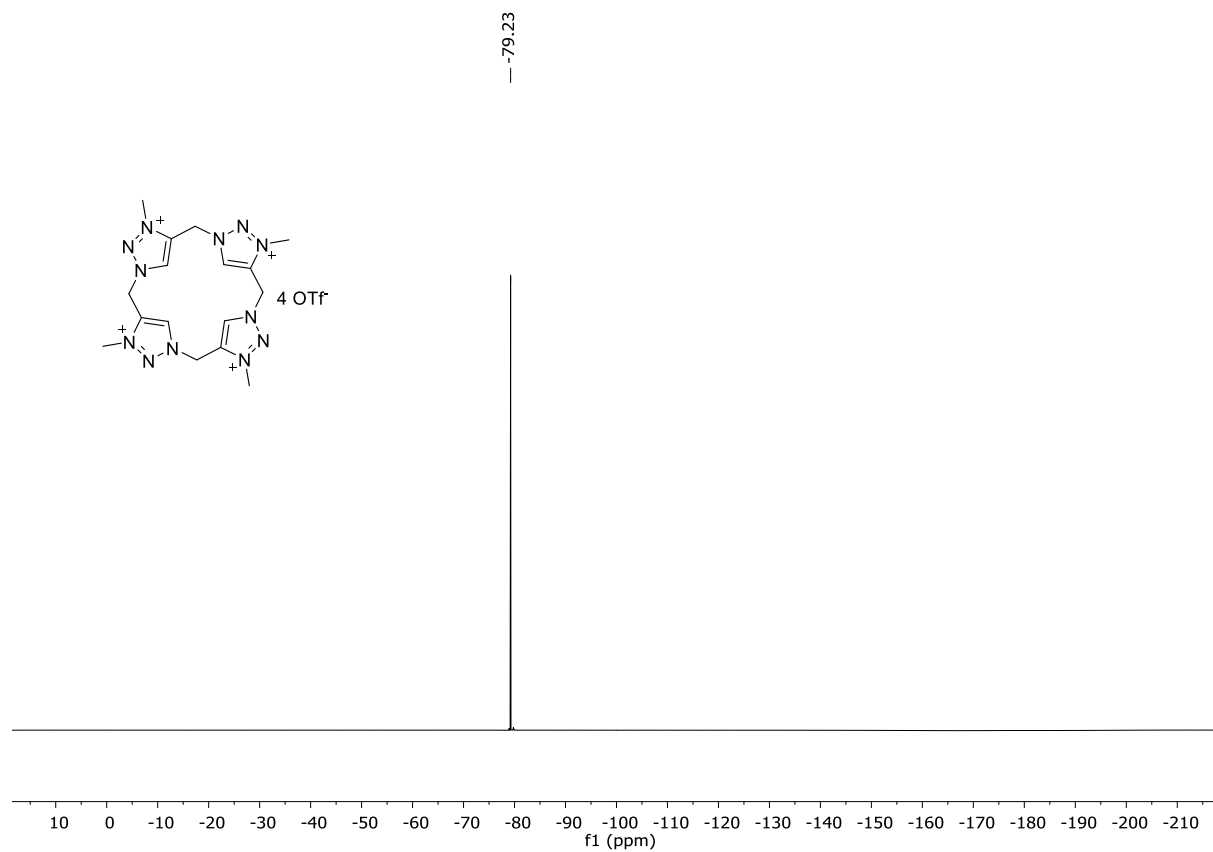

Fig. S26  $^{19}\text{F}$ -NMR spectrum of **b** in  $\text{CD}_3\text{CN}$ .

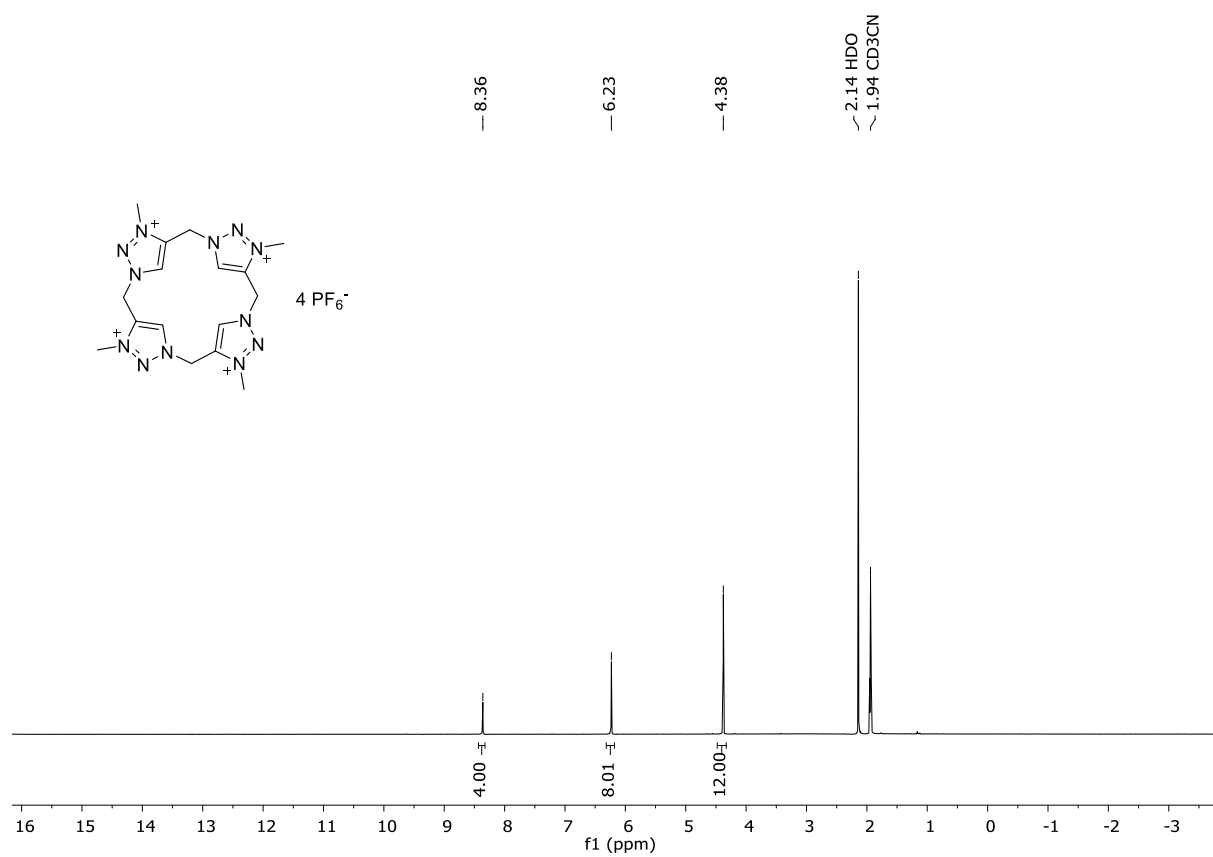

**Fig. S27**  $^1\text{H-NMR}$  spectrum of **c** in  $\text{CD}_3\text{CN}$ .

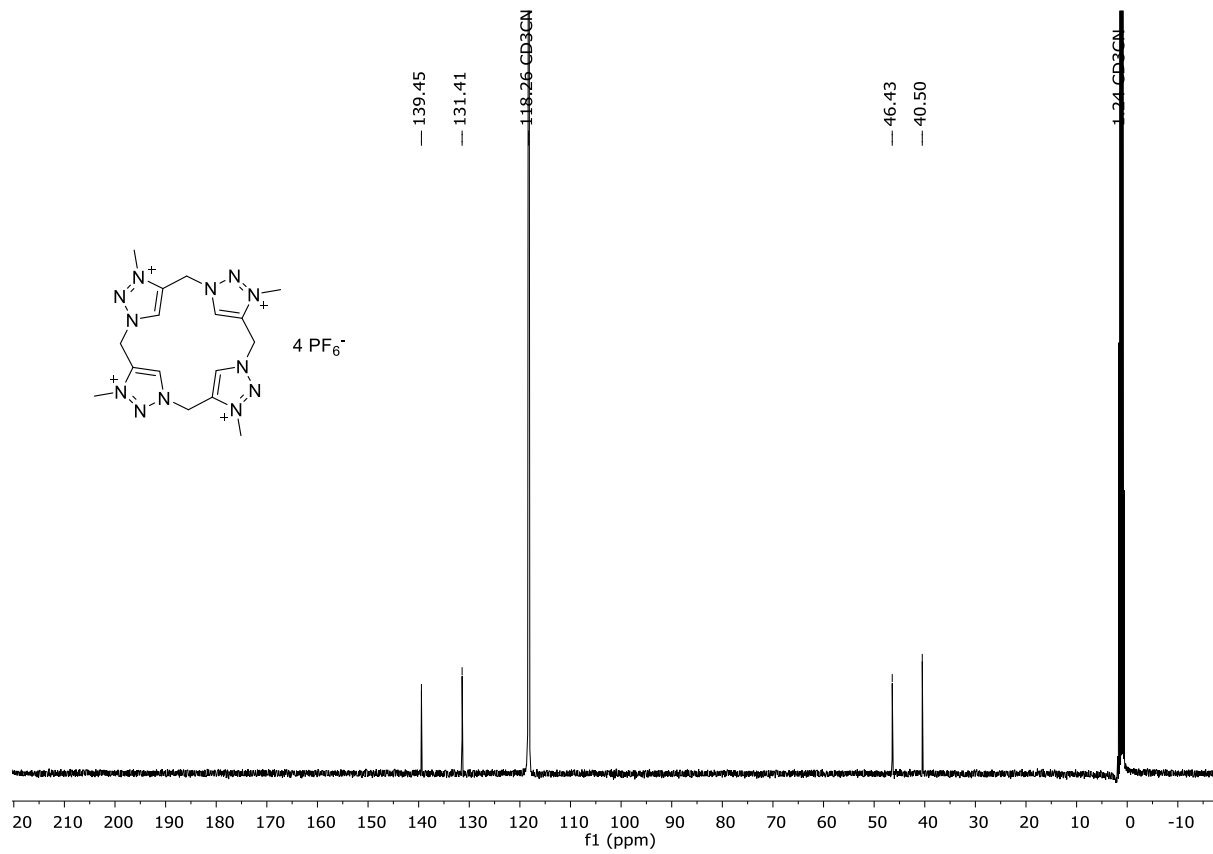

**Fig. S28**  $^{13}\text{C-NMR}$  spectrum of **c** in  $\text{CD}_3\text{CN}$ .

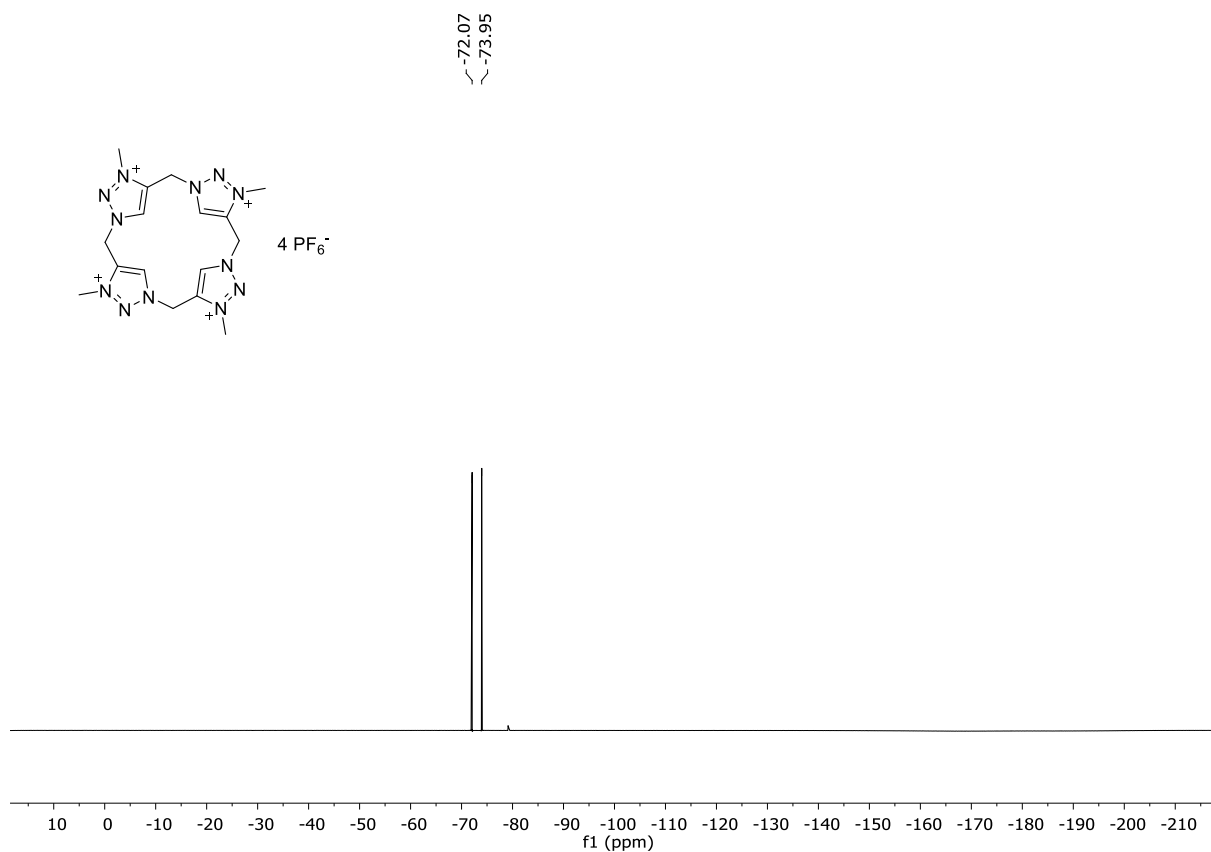

**Fig. S29** <sup>19</sup>F-NMR spectrum of **c** in CD<sub>3</sub>CN.

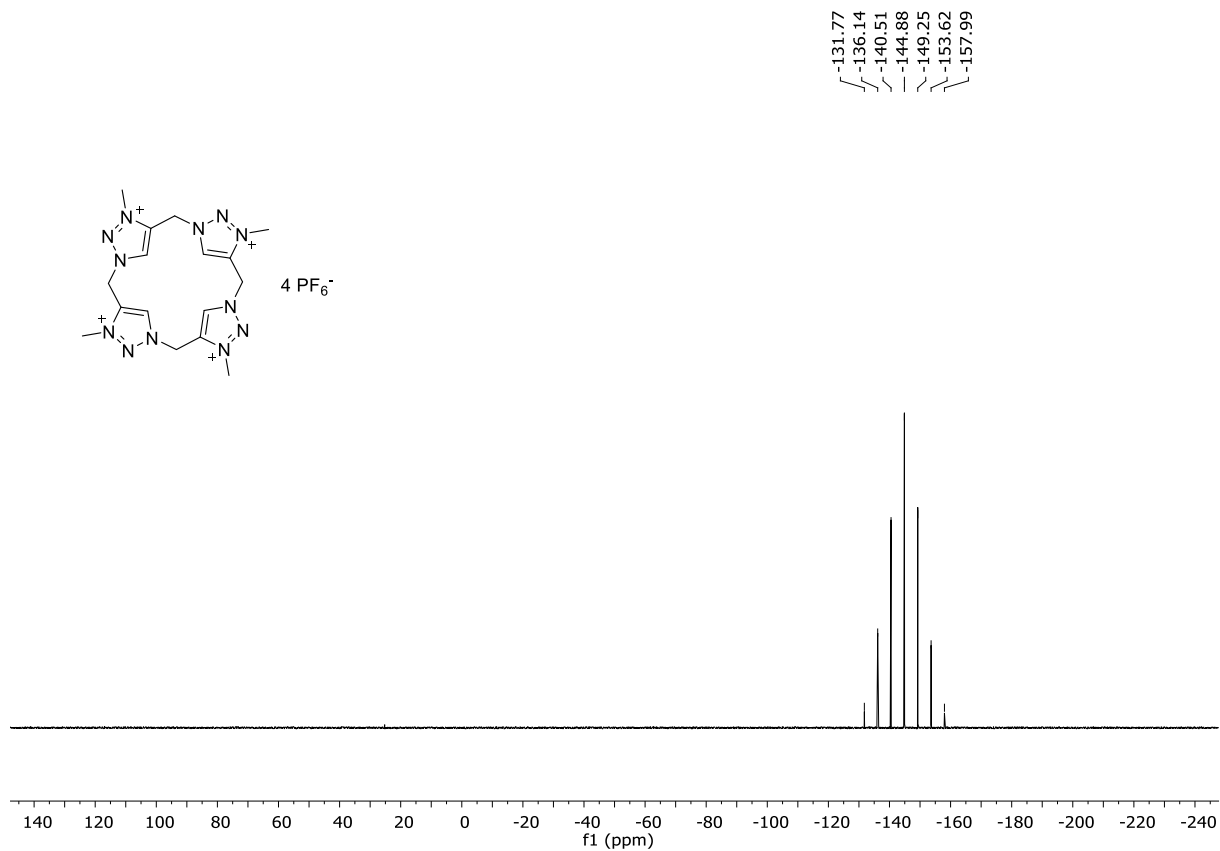

**Fig. S30** <sup>31</sup>P-NMR spectrum of **c** in CD<sub>3</sub>CN.



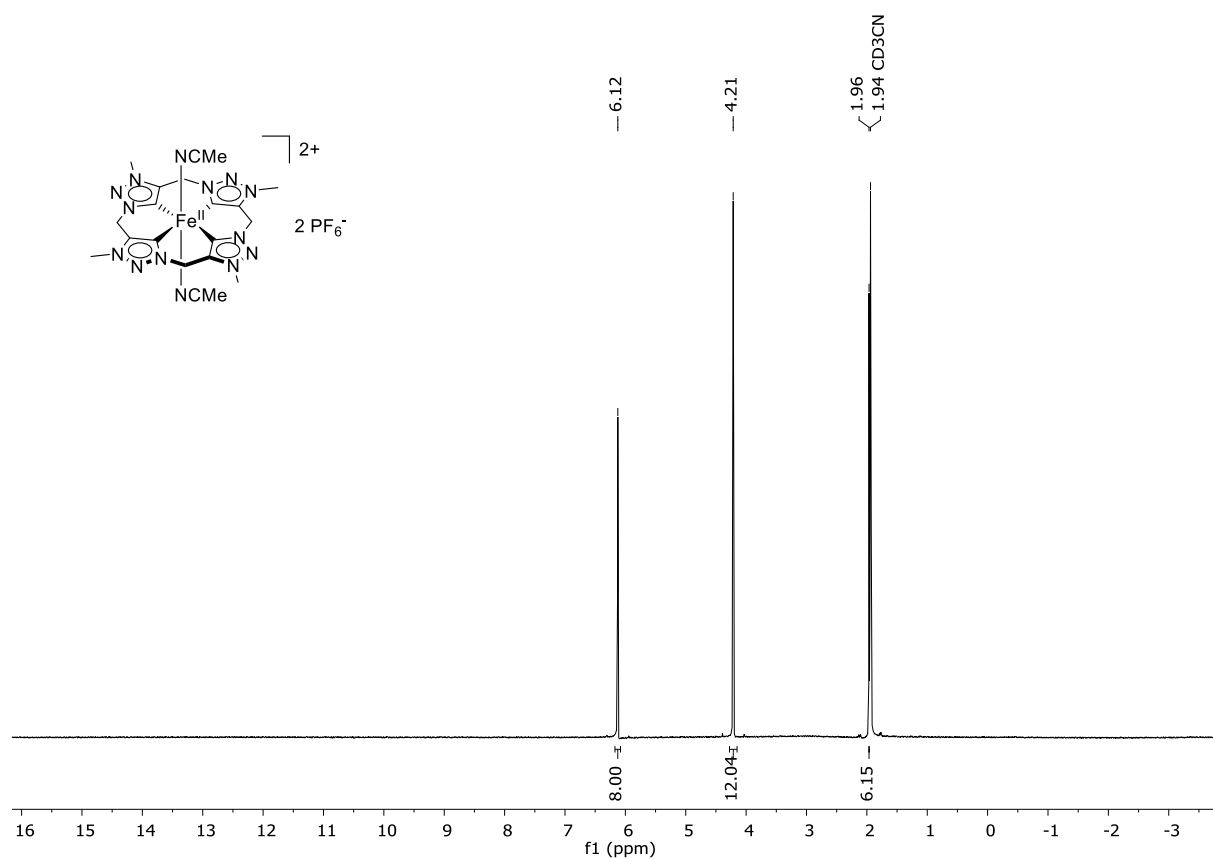

**Fig. S31**  $^1\text{H-NMR}$  spectrum of **2** in  $\text{CD}_3\text{CN}$ .

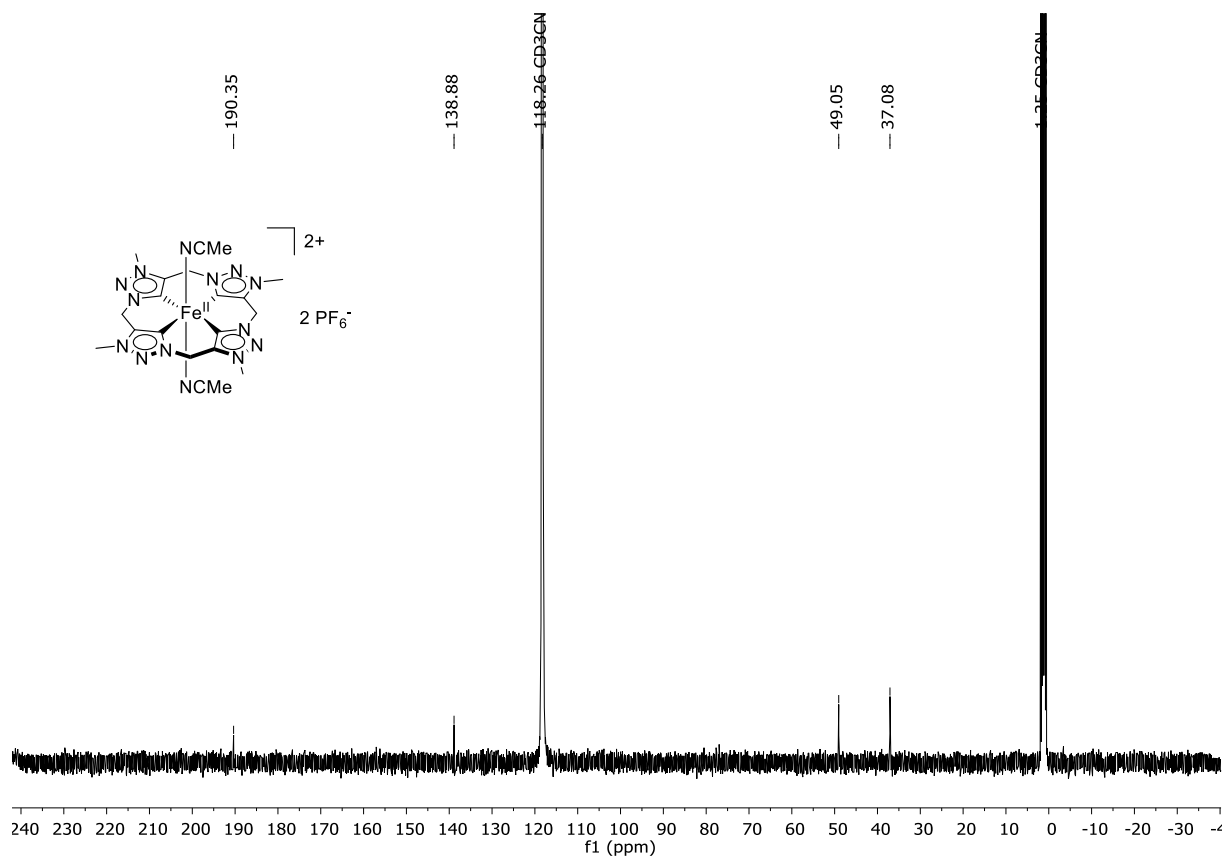

**Fig. S32**  $^{13}\text{C-NMR}$  spectrum of **2** in  $\text{CD}_3\text{CN}$ .

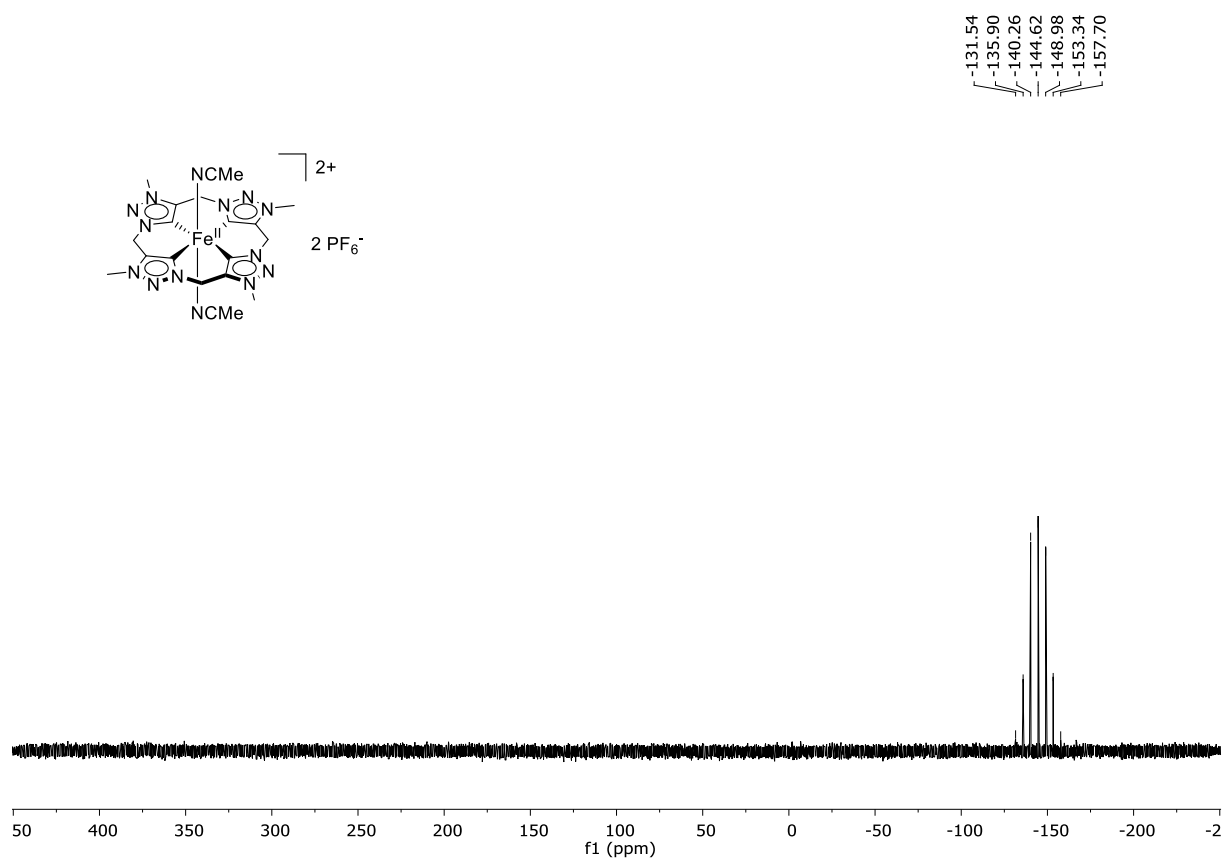

**Fig. S33**  $^{31}\text{P}$ -NMR spectrum of **2** in  $\text{CD}_3\text{CN}$ .

## 6. Catalytic procedure

All reactions were conducted at least twice in a cryostat (JulaboFP-50). Acetonitrile (HPLC-grade) as solvent was applied for all experiments. The catalyst (0.50 mol%) was added from a preformed stock solution in dry and degassed acetonitrile corresponding to the appropriate stoichiometry to a solution of *cis*-cyclooctene (1.00 eq., 67.3  $\mu\text{mol/mL}$ ). Hydrogen peroxide (1.5 eq., 101  $\mu\text{mol/mL}$ ) was used as oxidising agent and, if required,  $\text{Sc}(\text{OTf})_3$  as additive (0.1 eq., 8.41  $\mu\text{mol/mL}$ ). The reaction was started upon addition of the catalyst stock solution, by adding the catalyst solution all at once. The reaction was terminated by adding electrolytically precipitated activated  $\text{MnO}_2$  in order to decompose the excess of  $\text{H}_2\text{O}_2$  in the reaction solution. After filtration over activated neutral alumina (separation of the catalyst), two GC samples were prepared for each experiment using 200  $\mu\text{L}$  filtrate, diluted with 1300  $\mu\text{L}$  MeCN and *p*-xylene as external standard for each chosen time point. The identification of the product epoxide and by-products, such as 1,2-cyclooctanediol was confirmed *via* GC-FID based on the corresponding retention times. Control experiments without catalyst were performed for all reactions. An additional blank experiment with a simple iron salt, iron(II) chloride in the presence of  $\text{H}_2\text{O}_2$  was conducted to highlight the importance of iron complexes associated with NHCs due to minimal product and unselective side-product formation. Representative gas chromatograms for the catalytic experiments are shown in Fig. S34 to S37.

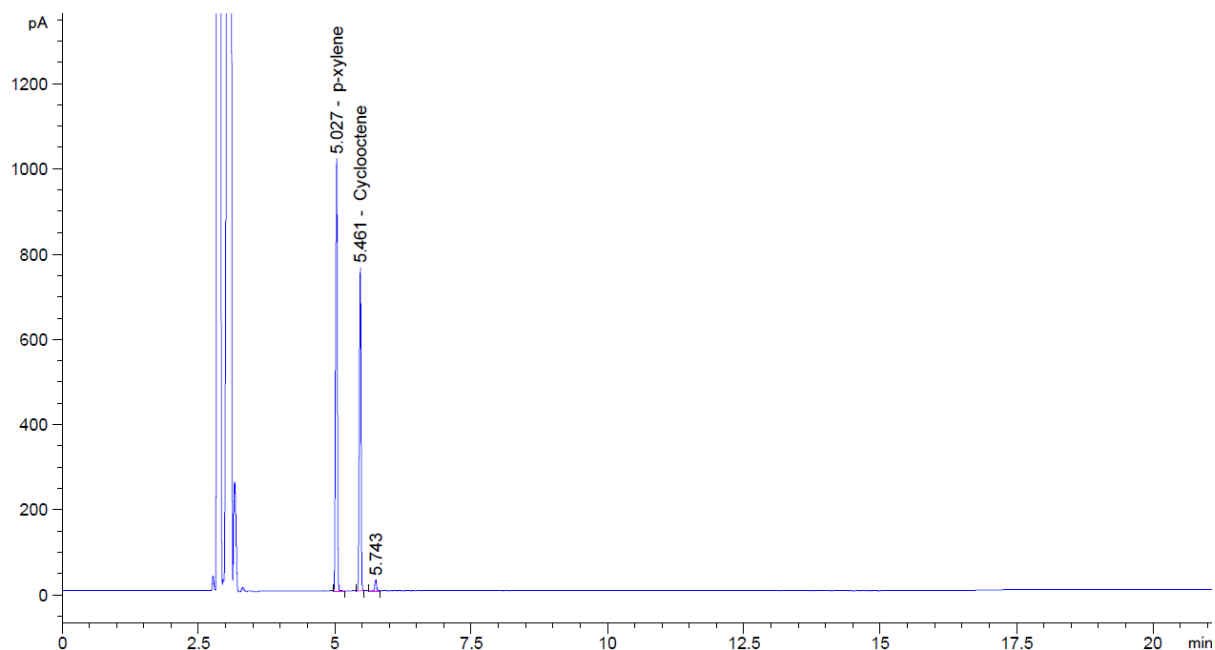

**Fig. S34** Representative gas chromatogram for the control experiments without catalyst addition after a reaction time of 10 min at 20 °C.

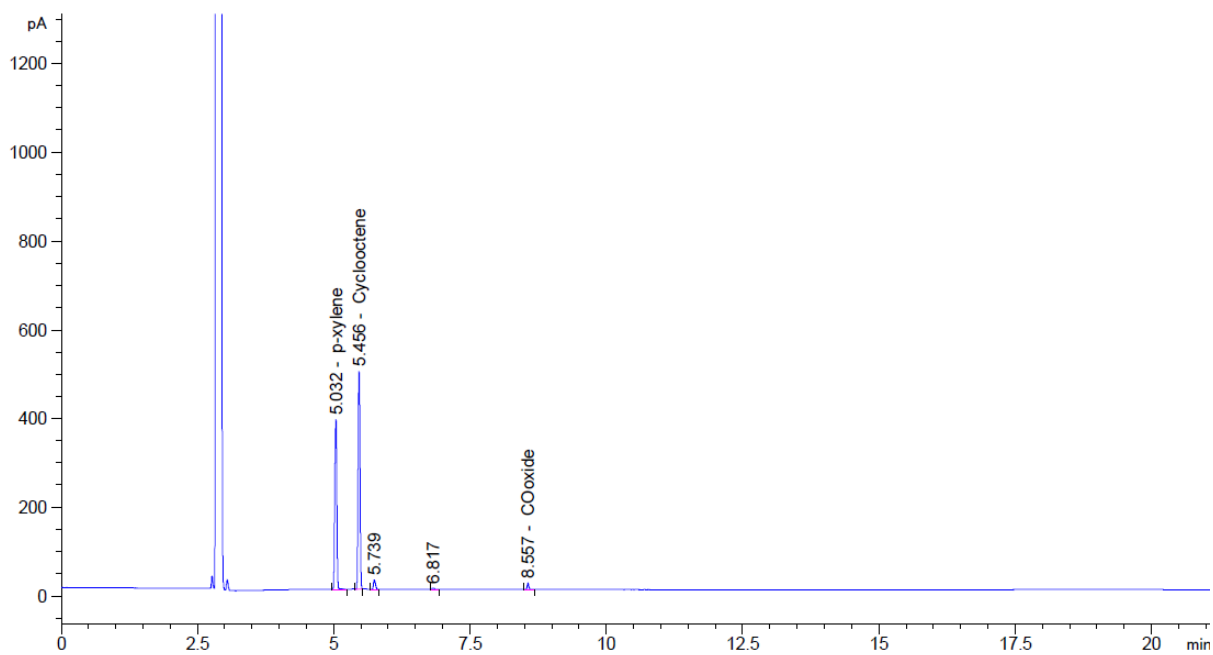

**Fig. S35** Representative gas chromatogram for the blank experiments with iron(II) chloride after a reaction time of 10 min at 20 °C.

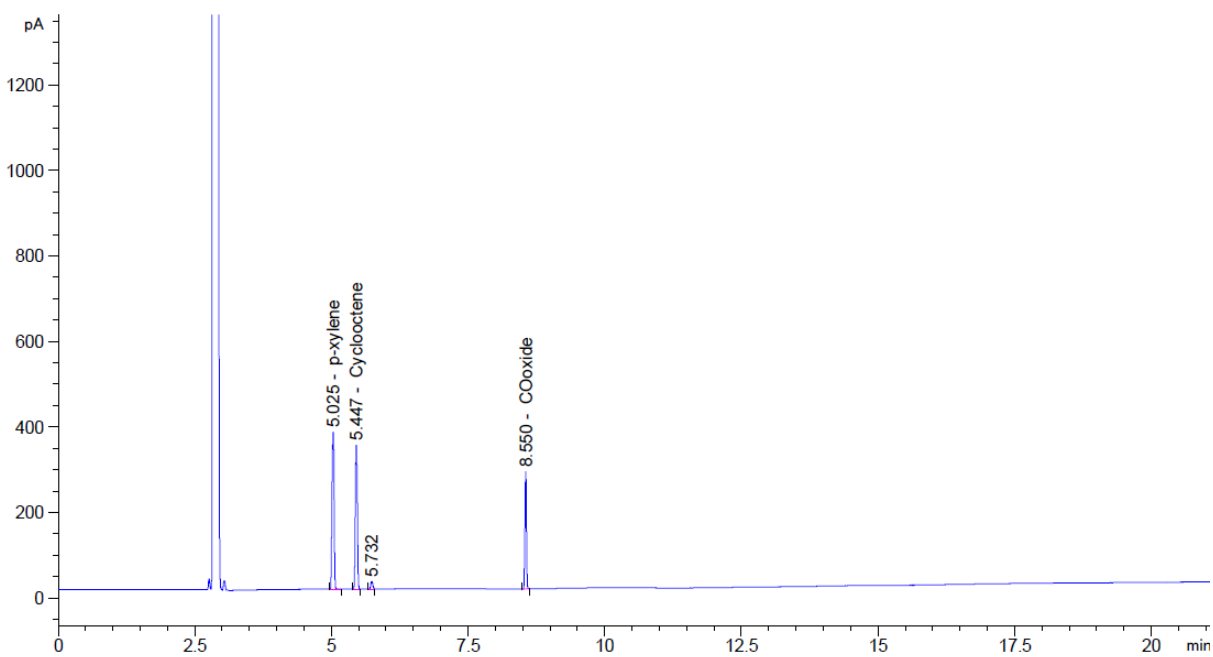

**Fig. S36** Representative gas chromatogram for the experiments with **2** after a reaction time of 10 min at 20 °C.

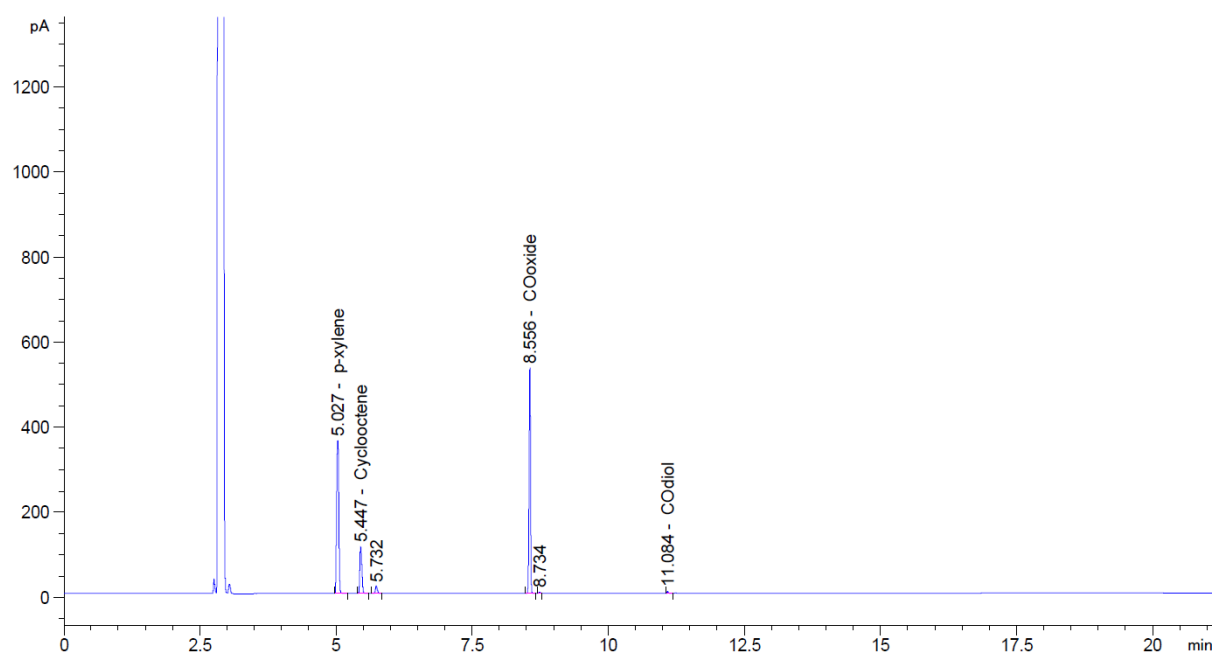

**Fig. S37** Representative gas chromatogram for the experiments with **2** with the addition of  $\text{Sc}(\text{OTf})_3$  after a reaction time of 5 min at 20 °C.

## 7. References

1. M. M. Olmstead, P. P. Power and S. C. Shoner, *Inorg. Chem.*, 1991, **30**, 2547-2551.
2. H. J. Shine, B.-J. Zhao, J. N. Marx, T. Ould-Ely and K. H. Whitmire, *J. Org. Chem.*, 2004, **69**, 9255-9261.
3. B. D. McCarthy, D. J. Martin, E. S. Rountree, A. C. Ullman and J. L. Dempsey, *Inorg. Chem.*, 2014, **53**, 8350-8361.
4. G. R. Fulmer, A. J. Miller, N. H. Sherden, H. E. Gottlieb, A. Nudelman, B. M. Stoltz, J. E. Bercaw and K. I. Goldberg, *Organometallics*, 2010, **29**, 2176-2179.
5. *APEX suite of crystallographic software*, APEX 3, Version 2019-11.0, Bruker AXS Inc.: Madison, Wisconsin, USA, 2019.
6. *SAINT*, Version 8.38A, Bruker AXS Inc.: Madison, Wisconsin, USA, 2017.
7. *SADABS*, Version 2016/2, Bruker AXS Inc.: Madison, Wisconsin, USA, 2016.
8. G. M. Sheldrick, *Acta Crystallographica Section C: Structural Chemistry*, 2015, **71**, 3-8.
9. C. B. Hübschle, G. M. Sheldrick and B. Dittrich, *J. Appl. Crystallogr.*, 2011, **44**, 1281-1284.
10. G. M. Sheldrick, *Acta Crystallographica Section A: Foundations and Advances*, 2015, **71**, 3-8.
11. A. J. Wilson, *International Tables for Crystallography*. Kluwer Academic Publishers: Dordrecht, The Netherlands, 1992; Vol. C.
12. C. F. Macrae, I. Sovago, S. J. Cottrell, P. T. Galek, P. McCabe, E. Pidcock, M. Platings, G. P. Shields, J. S. Stevens and M. Towler, *J. Appl. Crystallogr.*, 2020, **53**, 226-235.
13. A. Spek, *Acta Crystallogr., Sect. D: Biol. Crystallogr.*, 2009, **65**, 148-155.
14. M. R. Anneser, S. Haslinger, A. Pöthig, M. Cokoja, J.-M. Basset and F. E. Kühn, *Inorg. Chem.*, 2015, **54**, 3797-3804.
15. M. Schaefer, N. Hanik and A. F. Kilbinger, *Macromolecules*, 2012, **45**, 6807-6818.
16. M. Juríček, K. Stout, P. H. Kouwer and A. E. Rowan, *J. Porphyr. Phthalocyanines*, 2011, **15**, 898-907.
17. I. Kim, K. C. Ko, W. R. Lee, J. Cho, J. H. Moon, D. Moon, A. Sharma, J. Y. Lee, J. S. Kim and S. Kim, *Org. Lett.*, 2017, **19**, 5509-5512.
